1

2

### 3 DNA polymerase theta suppresses mitotic crossing over

4

5 Juan Carvajal-Garcia<sup>1</sup>, K. Nicole Crown<sup>2</sup>, Dale A. Ramsden<sup>1,3,4</sup>, Jeff Sekelsky<sup>1,3,5,\*</sup>

6

7 <sup>1</sup>Curriculum in Genetics and Molecular Biology, University of North Carolina, Chapel Hill, NC,  
8 USA.

9 <sup>2</sup>Department of Biology, Case Western Reserve University. Cleveland, OH, USA.

10 <sup>3</sup>Lineberger Comprehensive Cancer Center, University of North Carolina, Chapel Hill, NC, USA.

11 <sup>4</sup>Department of Biochemistry and Biophysics, University of North Carolina, Chapel Hill, NC,  
12 USA.

13 <sup>5</sup>Integrative Program in Biological and Genome Sciences, University of North Carolina, Chapel  
14 Hill, NC, USA.

15 \*Corresponding author

16

17 E-mail: [sekelsky@unc.edu](mailto:sekelsky@unc.edu)

18

19

## 20 **Abstract**

21 Polymerase theta-mediated end joining (TMEJ) is a chromosome break repair pathway that is  
22 able to rescue the lethality associated with the loss of proteins involved in early steps in  
23 homologous recombination (*e.g.*, BRCA1/2). This is due to the ability of polymerase theta (Pol  $\theta$ )  
24 to use resected, 3' single stranded DNA tails to repair chromosome breaks. These resected DNA  
25 tails are also the starting substrate for homologous recombination. However, it remains unknown  
26 if TMEJ can compensate for the loss of proteins involved in more downstream steps during  
27 homologous recombination. Here we expand the number of homologous recombination proteins  
28 synthetic lethal with Pol  $\theta$  to the Holliday junction resolvases SLX4 and GEN1. SLX4 and GEN1  
29 are required for viability in the absence of Pol  $\theta$  in *Drosophila melanogaster*, and lack of all three  
30 proteins results in very high levels of apoptosis. We observe that flies deficient in Pol  $\theta$  and SLX4  
31 are extremely sensitive to DNA damaging agents, and mammalian cells require either Pol  $\theta$  or  
32 SLX4 to survive. Our results suggest that TMEJ and Holliday junction formation/resolution share  
33 a common DNA substrate, likely a homologous recombination intermediate, that when left  
34 unrepaired leads to cell death. One major consequence of Holliday junction resolution by SLX4  
35 and GEN1 is cancer-causing loss of heterozygosity due to mitotic crossing over. We measured  
36 mitotic crossovers in flies after a Cas9-induced chromosome break, and observed that this  
37 mutagenic form of repair is increased in the absence of Pol  $\theta$ . This demonstrates that TMEJ can  
38 function upstream of the Holliday junction resolvases to protect cells from loss of heterozygosity.  
39 Our work argues that Pol  $\theta$  can thus compensate for the loss of the Holliday junction resolvases  
40 by utilizing homologous recombination intermediates, suppressing mitotic crossing over and  
41 preserving the genomic stability of cells.

42

## 43 **Author summary**

44 Chromosome breaks are a common threat to the stability of DNA. Mutations in genes involved  
45 in the early steps of homologous recombination (*BRCA1* and *BRCA2*), a mostly error-free  
46 chromosome break repair pathway, lead to hereditary breast cancer. Cells lacking *BRCA1* and  
47 *BRCA2* rely on DNA polymerase theta, a key protein for a more error-prone pathway, for survival.  
48 Using fruit flies and mammalian cells, we have shown that mutations in genes involved in later  
49 steps of homologous recombination (*SLX4* and *GEN1*) also make cells reliant on polymerase  
50 theta. Moreover, we have shown that polymerase theta acts upstream of a type of homologous  
51 recombination that is error-prone and depends on *SLX4* and *GEN1*. This form of homologous  
52 recombination, termed Holliday junction resolution, creates mitotic crossovers, which can lead to  
53 loss of heterozygosity and cancer. Our results expand the cellular contexts that make cells  
54 depend on polymerase theta for survival, and the substrates that this protein can use to repair  
55 chromosome breaks.

## 56 Introduction

57 Double strand breaks (DSBs) are a particularly toxic form of DNA damage. DSBs are  
58 generated during common cellular processes (e.g. replication, transcription), after exposure to  
59 ionizing radiation, or by specialized mechanisms such as meiosis or the development of the  
60 adaptive immune system [1]. They are also essential intermediates during nuclease-dependent  
61 genome editing. Two pathways account for most DSB repair: non-homologous end joining  
62 (NHEJ), and homologous recombination (HR) [2]. In addition, polymerase theta-mediated end  
63 joining (TMEJ) has recently been identified as a third DSB repair pathway [3–5].

64 DNA polymerase theta (Pol  $\theta$ , gene name *POLQ*) was first shown to be involved in DSB repair  
65 in *Drosophila melanogaster* (fruit fly), and this function was found to be conserved in other  
66 invertebrates, plants, and mammals [3–7]. Inactivation of TMEJ by knocking out *POLQ* orthologs  
67 has little to no effect on organismal viability in mice, zebrafish, *Drosophila* and *Caenorhabditis*  
68 *elegans*. Only when exposed to exogenous DNA damaging agents does *POLQ* deficiency  
69 negatively impact survival, although to a lesser extent than other DSB repair pathways [8–11].  
70 However, Pol  $\theta$  is required in the absence of factors that promote both NHEJ (e.g. KU70 and  
71 53BP1) [12,13] and HR (e.g., BRCA1 and BRCA2) [13–15], showing that TMEJ can compensate  
72 for their loss. This is of particular interest in the context of HR-deficient breast and ovarian cancer,  
73 where Pol  $\theta$  has been proposed as a promising therapeutic target [16].

74 HR is a multi-stage process that can lead to different repair outcomes, some of which can be  
75 mutagenic [17]. An important example of mutagenic HR is mitotic crossing over, as it causes loss  
76 of heterozygosity, which can lead to cancer development [18,19]. The first step in HR is DNA end  
77 resection, which generates two 3'-ended ssDNA tails. One tail is used to invade another duplex  
78 DNA molecule, forming a displacement loop (D-loop) and priming DNA synthesis. Unwinding of  
79 the D-loop and reannealing to the other end of the broken molecule completes synthesis-  
80 dependent strand annealing (SDSA). Alternatively, the D-loop may progress to form a joint

81 molecule, termed double Holliday junction, that needs to be dissolved or resolved through  
82 cleavage for the chromosomes to be segregated; the latter process can lead to a mitotic crossover  
83 [2].

84 Mechanistically, how Pol  $\theta$  compensates for the loss of HR proteins is largely unknown.  
85 Mutations in genes involved in early stages of HR have been shown to be synthetic lethal with  
86 *POLQ*. This suggests that, when these steps are inactivated, the resulting 3' ssDNA can be used  
87 by Pol  $\theta$  to repair the DSB. It remains unclear whether mutations in genes involved in later steps  
88 in HR (e.g. downstream of *BRCA1/2*) can similarly generate recombination intermediates that are  
89 toxic for cells in the absence of Pol  $\theta$  activity.

90 Here we describe a strong genetic interaction between *POLQ* and the Holliday junction  
91 resolvase genes *SLX4* and *GEN1*, which encode some of the latest acting HR proteins, both in  
92 *Drosophila melanogaster* and in mammalian cells. We also show that Pol  $\theta$  suppresses mitotic  
93 crossing-over in flies, thus protecting cells from this potentially pathogenic form of repair.  
94 Moreover our results, together with the observation that *POLQ* mutations have no effect in SDSA  
95 in *Drosophila* [3], argue that Pol  $\theta$  is surprisingly important in processing HR intermediates even  
96 after D-loop formation.

97

## 98 **Results**

### 99 ***Brca2* and *POLQ* mutations are synthetic lethal in *Drosophila melanogaster***

100 During repair of double strand breaks (DSBs) in mammals, TMEJ is able to compensate for  
101 some HR deficiencies (Fig 1A). This is best illustrated by the requirement of *POLQ* for the survival  
102 of *BRCA1/2* mutant cancer cell lines [14,15], and the upregulation of *POLQ* in *BRCA1/2* deficient  
103 breast and ovarian tumors [14,20,21]. We therefore initially assessed whether a comparable  
104 phenomenon is evident at a whole animal level in *Drosophila*, by crossing flies heterozygous for

105 mutations in *PolQ* and *Brca2* (the *Drosophila melanogaster* orthologs of *POLQ* and *BRCA2*;  
106 hereafter, the human gene/protein names will be used for simplicity) (Fig 1B). Homozygous  
107 mutant flies are easily identified due to the presence of a dominant phenotypic marker in the  
108 homologous chromosome (*Curly (Cy)* for *BRCA2*, *Humoral, (Hu)* for *POLQ*) (Fig 1B); *Cy* and *Hu*  
109 are also recessive lethal. When we looked at the progeny of these flies, we observed that single  
110 mutant flies in either gene alone displayed approximately 100% viability (Fig 1C). Meanwhile, only  
111 12% of the expected double homozygous mutant flies eclosed as adults, indicating semi-lethality  
112 when these two proteins are absent (Fig 1C).

113 Previous investigations have emphasized the strong genetic interaction between *POLQ* and  
114 genes involved in early steps of HR (*i.e.*, steps preceding D-loop formation) (Fig 1A) [13–15].  
115 However, DNA intermediates formed downstream of end resection and strand invasion may also  
116 be amenable for repair by TMEJ. If this is true, genes involved in later steps of HR might also be  
117 synthetic lethal with *POLQ*. Therefore, we assessed whether a genetic interaction exists between  
118 *POLQ* and genes encoding proteins involved in late steps of HR.

### 119 **Pol $\theta$ is required for viability in the absence of the Holliday junction resolvases**

120 We decided to use *Drosophila melanogaster* to investigate the genetic relationship between  
121 Pol  $\theta$  and some of the latest acting HR proteins, the Holliday junction resolvases Mus312 (SLX4  
122 in humans), and Gen (GEN1 in humans). Human SLX4 is a scaffolding protein that coordinates  
123 at least three endonucleases: SLX1, XPF-ERCC1, and MUS81-EME1 (the interaction with  
124 MUS81-EME1 has only been reported in mammals), forming the SMX tri-nuclease [22–26]. GEN1  
125 acts independently of SLX4 [27]. These structure-specific endonucleases have both unique and  
126 overlapping DNA substrate specificities [28–30].

127 We assessed the viability of every double mutant combination (*POLQ SLX4*, *POLQ GEN1*,  
128 and *SLX4 GEN1*) as well as the triple mutant (*POLQ SLX4 GEN1*) by crossing heterozygous flies  
129 and comparing the fraction of adult homozygous mutant flies observed to what would be expected

130 by Mendelian genetics. While all three double mutant combinations are fully viable, flies that lack  
131 Pol  $\theta$ , SLX4, and GEN1 rarely progress to adulthood (1% survival) (Fig 2A). When using the  
132 *PolQ<sup>null</sup>* allele over *PolQ<sup>Z2003</sup>* (instead of the *PolQ<sup>null</sup>* homozygous), we observed a 3% survival for  
133 *POLQ SLX4 GEN1* mutant flies (n=1059). This is, to our knowledge, the first evidence for  
134 synthetic lethality for *POLQ* and genes required for steps in HR after strand invasion.

135 These results indicate a genetic redundancy between Pol  $\theta$  and the resolvases. The functions  
136 of the resolvases suggested that the synthetic lethality could be due to a role for Pol  $\theta$  in rescuing  
137 unresolved HR intermediates that arise from spontaneous DSBs, or stalled or broken replication  
138 forks. If this is the case, we reasoned such roles would be apparent as sensitivity to exogenous  
139 DNA damaging agents in double mutants that are viable in the absence of such agents.

140 We used ionizing radiation (IR) to induce DSBs, and camptothecin, a topoisomerase 1 poison,  
141 to generate stalled and broken replication forks. We compared the sensitivity of *POLQ*, *SLX4*,  
142 and *GEN1* single mutants, as well as *POLQ SLX4*, and *POLQ GEN1* double mutant flies to  
143 moderate doses of IR (1000 rads) and camptothecin (10  $\mu$ M). All three single mutants showed an  
144 average survival of  $\geq 80\%$  for both DNA damaging agents (Figs 2B and 2C). *POLQ SLX4* double  
145 mutant flies showed the strongest reduction of viability, 31% and 9% survival when treated with  
146 IR or camptothecin, respectively (Figs 2B and 2C). *POLQ GEN1* double mutants showed only a  
147 modest reduction in viability. Pol  $\theta$  is thus more important for cell viability in the absence of SLX4  
148 than in the absence of GEN1. These results show that DSBs and collapsed or broken replication  
149 forks generate DNA substrates, likely HR intermediates, that require the use of Pol  $\theta$  or SLX4 for  
150 repair.

151 We also tested whether SLX1 or MUS81, two of the nucleases that associate with SLX4,  
152 played a more significant role than the other in the repair of these intermediates. We observed  
153 mild sensitivity to IR of both *POLQ MUS81* and *POLQ SLX1* double mutants (Fig 2D), reflecting  
154 an apparent redundancy between these two nucleases in the presence of SLX4 and GEN1.  
155 Interestingly, *POLQ MUS81 GEN1* triple mutant flies are much more sensitive to IR (1% survival)

156 than *POLQ SLX1 GEN1* triple mutant flies (50% survival) (Fig 2D), which suggests that MUS81  
157 is required for the repair of certain DNA substrates in the absence of GEN1.

158 Next, we addressed whether this genetic interaction observed in flies is conserved in  
159 mammals. For this, we used T-antigen transformed mouse embryonic fibroblasts (MEFs) derived  
160 from isogenic wild type (wt) and *Polq*<sup>-/-</sup> mice [8]. In addition, we used *Polq*<sup>-/-</sup> MEFs that have been  
161 complemented with the human *POLQ* cDNA [5]. We electroporated ribo-nucleoprotein complexes  
162 of purified *Staphylococcus pyogenes* Cas9 protein with gRNAs targeting either the non-protein-  
163 coding *Rosa26* locus (control locus, *R26*) or exon 4 in *SLX4* (Fig 3A). 72 hours later, we assayed  
164 cell viability by a colony formation assay. In addition, we harvested DNA from the cells, amplified  
165 the genomic regions across the Cas9 site and used tracking of indels by decomposition (TIDE)  
166 [31] to calculate the fraction of chromatids that had an indel at the target sites (% editing) (Fig  
167 3A). Targeting *SLX4* did not decrease viability in wt or in complemented *Polq*<sup>-/-</sup> MEFs compared  
168 to targeting the non-coding locus (Fig 3B). However, we observed a 54% reduction in viability in  
169 the *Polq*<sup>-/-</sup> MEFs when targeting *SLX4*, relative to the control locus, which matches the editing  
170 efficiency of 58% in that cell line (Fig 3B). Unlike flies, this decrease in viability in *POLQ SLX4*  
171 double mutants MEFs is observed in the absence of exogenous DNA damage, arguing the  
172 genetic interaction between *POLQ* and *SLX4* is stronger in mammalian cells than it is in flies.

### 173 **Lack of Pol $\theta$ and resolvases leads to high levels of apoptosis**

174 Interestingly, defects in cell survival or proliferation, which can be seen in disrupted tissue  
175 patterning in the abdomen, could be readily observed in *POLQ SLX4* double mutant adult flies  
176 (Fig 4A). This was not seen in the *POLQ GEN1* double mutant or on any of the single mutants,  
177 and has been described in *POLQ RAD51* double mutants [3].

178 To accurately quantify the level of apoptosis in flies with different genotypes, we used an  
179 antibody that detects cleaved Dcp-1, a marker of apoptosis in *Drosophila* [32]. We immunostained  
180 larval wing imaginal discs, a highly proliferative tissue that becomes the adult wings after  
181 metamorphosis. The use of a larval tissue also allows us to assess the levels of apoptosis in



182 *POLQ SLX4 GEN1* flies, as some of these animals reach the larval stage. We observed very little  
183 apoptosis in *POLQ* mutant flies, while levels of apoptosis were significantly higher in *POLQ SLX4*,  
184 and even higher in the *POLQ SLX4 GEN1* triple mutant (Figs 4B and 4C). This is consistent with  
185 the reduction in viability observed due to endogenous DNA damage in the *POLQ SLX4 GEN1*  
186 triple mutant, as well as sensitivity to exogenous DNA damage by IR or camptothecin in the *POLQ*  
187 *SLX4* double mutant.

### 188 **Pol $\theta$ suppresses mitotic crossovers**

189 The strong genetic interaction between Pol  $\theta$  and the resolvases suggests that their repair  
190 pathways share a common DNA substrate that, when left unrepaired, causes cell death. We  
191 hypothesize that this substrate is an HR intermediate. In *Drosophila* somatic cells, both TMEJ and  
192 Holliday junction formation are downstream of the preferred HR pathway, SDSA. This is evident  
193 as Pol  $\theta$ -dependent end joining products and mitotic crossovers are increased when SDSA is  
194 inactive due to the absence of the BLM helicase [33,34]. This leads to a model in which DNA  
195 intermediates formed after aborted SDSA can then be processed by either TMEJ or the structure-  
196 specific endonucleases. In the absence of both pathways, these DNA intermediates accumulate  
197 and become toxic to cells, which ultimately undergo apoptosis and die.

198 We set out to identify potential consequences of the epistatic relationship between TMEJ and  
199 Holliday junction resolution that was described above by designing a DSB repair assay in  
200 *Drosophila* (Fig 5A) that allows for assessment of an expected product of Holliday junction  
201 resolution, mitotic crossovers. DSBs are generated in the germline cells of male flies by  
202 expressing Cas9 under a germline promoter (*nos*), and a gRNA, expressed with the U6 promoter,  
203 targeting the coding region of the *rosy* (*ry*) gene, located in the right arm of chromosome 3.  
204 Homozygous mutant flies for these gene are viable and have an easily identifiable mutant eye

205 color. Only the maternal chromosome gets cut, as the paternal harbors a SNP that alters the  
206 protospacer adjacent motif (PAM) sequence recognized by Cas9 (TGG becomes TGA) (Fig 5A).

207 Using phenotypic markers as well as the SNP described above, this assay allows us to detect  
208 mutagenic end joining, homologous recombination events that used the homologous  
209 chromosome as a template, and unedited (never cut/perfectly repaired) chromosomes. Moreover,  
210 we can characterize HR events as crossovers or non-crossovers due to the presence of the  
211 phenotypic markers *scarlet* (*st*) and *ebony* (*e*), as well as the fact that *Drosophila* males don't  
212 generate crossovers during meiosis [34].

213 We performed this assay using 60 single males, 6 of which were sterile. Of the 54 remaining  
214 males, 40 (74%) had been edited, showing that the assay is highly efficient (Fig 5B). In wt flies  
215 we observed that repair of a DSB by end joining (EJ) and HR is roughly equally common (EJ:  
216 21/54, 39%; HR: 19/54, 35%) (Fig 5B).

217 Mitotic crossovers are present in only 0.2% of wild type flies (Figs 5C and 5D); strikingly, they  
218 are present at 18-fold higher levels in *POLQ* deficient flies (Fig 5D). Interestingly, ablation of all  
219 resolvase activity (i.e. both SLX4 and GEN1) was required to eliminate mitotic crossing over. This  
220 is contrast to mitotic crossovers generated in the absence of the anti-crossover helicase FANCM,  
221 which depend solely on SLX4 [35], and are likely not originated by a blunt DSB like the ones in  
222 this assay.

223 Of note, repair events could plausibly be amplified unevenly due to cell division in the male  
224 germline. Even though we don't expect this to disproportionately affect different genotypes, we  
225 analyzed these results in a more stringent manner, by assessing only whether a male had some  
226 crossover progeny or no crossover progeny. The results of this analysis mirrored those in the  
227 previous one, though the magnitude of the change was lower (3.5X more mitotic crossovers in  
228 *POLQ* mutant flies than in wt flies) (Table 1). This latter analysis is definitively unaffected by

229 unequal expansion, but presumably underestimates the amount of crossing over due to our  
230 inability to distinguish between one and multiple cross-over events in the same male.

231

Table 1: Mitotic crossing over is increased in *POLQ* mutant flies

| Genotype         | MCOs |    | $p$ ( $X^2$ with Yate's correction) |
|------------------|------|----|-------------------------------------|
|                  | Yes  | No |                                     |
| wt               | 5    | 92 | N.A.                                |
| <i>POLQ</i>      | 10   | 45 | 0.021                               |
| <i>SLX4</i>      | 7    | 55 | 0.26                                |
| <i>GEN1</i>      | 6    | 54 | 0.40                                |
| <i>SLX4 GEN1</i> | 0    | 69 | 0.15                                |

232

233 These results show that the absence of Pol  $\theta$  increases the amount of mitotic crossing over  
234 caused by HR. Moreover, our results further imply that Pol  $\theta$  can act upstream of the Holliday  
235 junction resolvases, and thus presumably upstream of Holliday junction formation as well.

236

## 237 Discussion

238 Pol  $\theta$  has the ability to compensate for the loss of BRCA1 and BRCA2, key mediators of HR,  
239 as well as for loss of proteins involved in NHEJ [12,14,15]. Moreover, a recent synthetic lethality  
240 screen uncovered 140 genes that have a synthetic growth defect with *POLQ*, most of which  
241 operate outside of DSB repair, and showed that as much as 30% of breast tumors may be relying  
242 on *POLQ* for survival [13]. This ability has motivated the search for a Pol  $\theta$  inhibitor for treatment  
243 of cancer [36].

244 However, no HR gene outside of the resection/strand invasion step has been shown to be  
245 synthetic lethal with *POLQ*. Here we show that flies deficient in Pol  $\theta$ , *SLX4*, and *GEN1* – which  
246 act late during HR – are inviable, due to high levels of apoptosis caused by endogenous DNA  
247 damage, and that flies with mutations in *POLQ* and *SLX4* are hypersensitive to the DNA damaging  
248 agents IR and camptothecin. Moreover, we demonstrate that the genetic interaction between

249 Pol  $\theta$  and SLX4 is conserved in mice. This striking genetic redundancy strongly suggests that  
250 TMEJ and Holliday junction formation/resolution share a common substrate.

251 The ability of Pol  $\theta$  to rescue deficiencies in HR genes is not completely understood. A well-  
252 defined starting substrate for TMEJ is generated after 5' resection of both ends of a DSB [5,12],  
253 yet it is not known whether that is the only substrate used by Pol  $\theta$ . Two 3' ssDNA tails are also  
254 the starting substrate in HR, implying a possible competition between TMEJ and HR. The difficulty  
255 in accurately measuring the different outcomes of HR in mammalian cells has led to conflicting  
256 evidence on whether Pol  $\theta$  has the ability to suppress HR, and therefore compete for a starting  
257 substrate [12,14,15].

258 Well characterized assays in *Drosophila* allow for the unambiguous assessment of SDSA, the  
259 major pathway for completion of repair by HR in somatic cells [33]. Lack of Pol  $\theta$  doesn't affect  
260 the frequency of DSB-induced SDSA in flies [3], arguing that at least in *Drosophila*, Pol  $\theta$  does  
261 not compete for the 3' ends generated by 5' end-resection. In contrast, Pol  $\theta$  suppresses mitotic  
262 crossovers and is synthetic lethal with resolvase deficiency, arguing it does compete for repair by  
263 the alternate means for completion of HR that involves a double Holliday junction.

264 Thus, though the generation of small indels is implicit to repair by TMEJ, this pathway protects  
265 against more deleterious forms of repair, such as larger deletions [21], or interhomolog  
266 recombination after a DSB is made in both homologs [37]. Holliday junction resolution also  
267 generates mutations, in the form of loss of heterozygosity, that can affect whole chromosome  
268 arms. The high potential pathogenicity of these events may make them more detrimental to cells  
269 than small indels, supporting Pol  $\theta$ 's role in maintaining genomic stability.

270

## 271 **Materials and methods**

### 272 ***Drosophila* stocks**

273 *Drosophila* stocks were kept at 25°C on standard cornmeal media (Archon Scientific). Mutant  
274 alleles were obtained from the Bloomington *Drosophila* Stock Center (BDSC) or were a gift from  
275 Dr. Mitch McVey and have been described in [38] (*Brca2<sup>KO</sup>*), [39] (*Brca2<sup>47</sup>*), [40] (*PolQ<sup>null</sup>*) and [3]  
276 (*PolQ<sup>Z2003</sup>*), [41] (*mus312<sup>D1</sup>* and *mus312<sup>Z1973</sup>*), [42] (*Gen<sup>Z5997</sup>*, *slx1<sup>F93I</sup>* and *slx1<sup>e01051</sup>*), and [43]  
277 (*mus81<sup>Nhe</sup>*). *PolQ<sup>null</sup>* was used either homozygous (Figs 1, 2 and 4), or over *PolQ<sup>Z2003</sup>* (Fig 5).  
278 *Brca2* and *mus312* alleles were used compound heterozygous. *Gen<sup>Z5997</sup>* was used hemizygous  
279 over the deficiency *Df(3L)6103*. Since *mus81* is in the X chromosome, *mus81<sup>Nhe</sup>* was used  
280 homozygous in females and hemizygous in males. Allele-specific PCR was used to detect the  
281 presence of the mutant alleles in recombinant chromosomes (primers in S1 Table).

282 Flies expressing *Streptococcus pyogenes* Cas9 controlled by the *nanos* promoter, inserted on  
283 the X chromosome (attPA2) were obtained from BDSC (stock number 54591 [44]).

284 Flies expressing a gRNA targeting the *rosy* (*ry*) locus (5'-CATTGTGGCGGAGATCTCGA-3')  
285 were generated by cloning the gRNA sequence into the pCFD3 plasmid (Addgene #49410) as in  
286 [44]. The gRNA was stably integrated into an attP landing site at 58A using phi-C31 targeting  
287 (stock number 24484) (Best Gene).

288 For the generation of flies with a deletion of the *ry* locus, two gRNA sequences were cloned  
289 into the pU6-BbsI-chiRNA plasmid (Addgene #45946) [45]. One gRNA targeted 5' of the *ry* start  
290 site (5'-GGCCATGTCTAGGGGTTACG-3') and the other targeted 3' of the *ry* stop codon (5'-  
291 GATATGCACAGAATGCGCCT-3'). These were injected along with the pHsp70-Cas9 plasmid  
292 (Addgene #45945) [45] into a *w<sup>1118</sup>* stock (Best Gene). The resulting *ry* deletion starts 373 bp  
293 upstream of the *ry* start codon and ends 1048 bp downstream of the *ry* stop codon.

## 294 **DNA damage survival assays**

295 Survival in the presence of DNA damaging agents was determined as in [46]. Five females  
296 and three males carrying heterozygous mutations for the indicated genes were allowed to mate  
297 and to lay eggs for 72 hours (untreated progeny), when they were moved to a new vial where  
298 they laid for 48 hours (treated progeny). The latter brood was exposed to 1000 rads of ionizing

299 radiation (source:  $^{137}\text{Cs}$ ) or 10  $\mu\text{M}$  camptocethin, diluted from a concentrated stock in a 10%  
300 ethanol, 2% Polysorbate 20 aqueous solution. The fraction of heteroallelic mutant flies in the  
301 treated progeny was divided by the fraction of homozygous mutant flies in the untreated progeny  
302 to calculate the survival.

### 303 **Cell lines**

304 Mouse Embryonic Fibroblasts (MEFs) were made from isogenic wt or *Po/q*-null mice generated  
305 by conventional knock-out [8] that were obtained from Jackson Laboratories and maintained on  
306 a C57BL/6J background and immortalized with T antigen as described in [5]. Cells were incubated  
307 at 37 °C, 5%  $\text{CO}_2$  and cultured in DMEM (Gibco) with 10% Fetal Bovine Serum (VWR Life Science  
308 Seradigm) and Penicillin (5 U/ml, Sigma). All lines used in this study were certified to be free of  
309 mycoplasma by a qPCR [47] with a detection limit below 10 genomes/ml. In addition, cell lines  
310 were randomly selected for third party validation using Hoechst staining [48].

### 311 **Clonogenic survival assay**

312 Transfections were performed as in [21]. Genome targeting ribonucleotide-protein complexes  
313 (RNP) were made by annealing the indicated crRNA (*R26*: 5'-ACTCCAGTCTTTCTAGAAGA-3',  
314 *SLX4*: 5'-ACAGCAGGAGTTTAGAAGGG-3') to a tracrRNA (Alt-R, IDT) to form 8.4 pmol of gRNA,  
315 followed by incubation of annealed gRNA with 7 pmol of purified Cas9 (made after expression of  
316 Addgene #69090) [49]. The assembled RNPs were electroporated into 200,000 MEFs along with  
317 32ng of pMAX-GFP using the Neon system (Invitrogen) in a 10  $\mu\text{l}$  tip with one 1,350 V, 30 ms  
318 pulse and plated (three electroporations formed one biological replicate). After 72 h, 500 cells  
319 were plated into 3 different plates and let grow for a week to allow for colonies to form. Cells were  
320 fixed and stained as in [50], using a 6% glutaraldehyde, 0.5% crystal violet aqueous solution.  
321 Colonies were counted and survival was calculated for each cell line individually. Genomic DNA  
322 for the remaining cells was harvested and used as a template for the generation of a PCR product

323 surrounding the *SLX4* break site (primers in S1 Table). This PCR product was sequenced (Eton)  
324 and the editing efficiency was calculated using TIDE [31].

### 325 **Wing imaginal disc immunofluorescence**

326 Heads of third instar, 5-7-day old, homozygous mutant for the indicated genes, larvae were  
327 dissected in phosphate-buffered saline (PBS), inverted, and fixed in 4% formaldehyde at room  
328 temperature for 45 min. They were washed three times in PBS+0.1% Triton-X (PBSTx), blocked  
329 in 5% normal goat serum for one hour at room temperature, and incubated overnight at 4°C in a  
330 1:100 dilution of cleaved Dcp-1 antibody (Cell signaling #9578S) in PBSTx. Larva heads were  
331 then washed six times with PBSTx and incubated in a 1:500 dilution of secondary antibody (goat  
332 anti-Rabbit IgG, Alexa Fluor 488, Life Technologies) for two hours at room temperature. After  
333 washing six times in PBSTx, DAPI was added at a 1:1000 dilution. Discs were dissected and  
334 mounted in 50 ul of Fluoromount G mounting media (Thermo).

335 Pictures were taken with a Zeiss LSM880 confocal laser scanning microscope using a 40X oil  
336 immersion objective with a constant gain and a 0.6X zoom using ZEN software. Images were  
337 saved as .czi files and were processed and the signal was quantified using ImageJ as in [51].

### 338 **Mitotic crossover assay**

339 For Fig 4B, single males expressing Cas9 and the gRNA targeting the *ry* gene were generated.  
340 In addition, these flies were heterozygous the genes *st* and *e* as well as for a SNP that changes  
341 the PAM sequence recognized by Cas9 immediately downstream of the gRNA sequence (the  
342 chromosome with the mutation in *st* has the functional PAM and will be cut by Cas9). These males  
343 were crossed to females that were homozygous mutant for *ebony* (*e*) and heterozygous for a  
344 dominant mutation in *Antennapedia* (*Hu*). To characterize the repair event that occurred after the  
345 DSB, a single male progeny, heterozygous for *e* and *Hu*, was crossed to females homozygous  
346 for a deletion in *ry*. If the non-*Hu* progeny were *ry*, the repair event was characterized as  
347 mutagenic end joining (EJ). If the non-*Hu* progeny weren't *ry*, genomic DNA from a single male

348 was extracted and the DNA surrounding the break was amplified by PCR (primers in S1 Table).  
349 The presence of the silent mutation that changes the PAM sequence, revealed by resistance to  
350 cutting by *BccI* of the PCR product surrounding the Cas9 target site, was interpreted as HR. The  
351 presence of the intact PAM was characterized as unedited.

352 For Fig 4D and table 1, single males as the ones described above and with maternal and  
353 zygotic mutations in the indicated genes, were crossed to flies homozygous mutant for *st* and *e*.  
354 Flies that were wild type for both markers or mutant for both markers were characterized as having  
355 a crossover event.

356

## 357 **Acknowledgements**

358 The authors would like to acknowledge Dr Mitch McVey for providing the *PoIQ<sup>null</sup>*, *PoIQ<sup>Z2003</sup>*,  
359 *BRCA<sup>KO</sup>* and *BRCA<sup>47</sup>* flies, as well as Susan McMahan for technical assistance.

360

## 361 **References**

- 362 1. Chapman JR, Taylor MRG, Boulton SJ. Playing the End Game: DNA Double-Strand  
363 Break Repair Pathway Choice. *Molecular Cell*. 2012. pp. 497–510.  
364 doi:10.1016/j.molcel.2012.07.029
- 365 2. Scully R, Panday A, Elango R, Willis NA. DNA double-strand break repair-pathway  
366 choice in somatic mammalian cells. *Nature Reviews Molecular Cell Biology*. 2019. pp.  
367 698–714. doi:10.1038/s41580-019-0152-0
- 368 3. Chan SH, Yu AM, McVey M. Dual roles for DNA polymerase theta in alternative end-  
369 joining repair of double-strand breaks in *Drosophila*. *PLoS Genet*. 2010;6: 1–16.  
370 doi:10.1371/journal.pgen.1001005



- 371 4. Roerink SF, Schendel R, Tijsterman M. Polymerase theta-mediated end joining of  
372 replication-associated DNA breaks in *C. elegans*. *Genome Res.* 2014;24: 954–962.  
373 doi:10.1101/gr.170431.113
- 374 5. Yousefzadeh MJ, Wyatt DW, Takata K ichi, Mu Y, Hensley SC, Tomida J, et al.  
375 Mechanism of Suppression of Chromosomal Instability by DNA Polymerase POLQ. *PLoS*  
376 *Genet.* 2014;10. doi:10.1371/journal.pgen.1004654
- 377 6. Yu AM, McVey M. Synthesis-dependent microhomology-mediated end joining accounts  
378 for multiple types of repair junctions. *Nucleic Acids Res.* 2010;38: 5706–5717.  
379 doi:10.1093/nar/gkq379
- 380 7. Van Kregten M, De Pater S, Romeijn R, Van Schendel R, Hooykaas PJJ, Tijsterman M.  
381 T-DNA integration in plants results from polymerase- $\theta$ -mediated DNA repair. *Nat Plants.*  
382 2016;2. doi:10.1038/nplants.2016.164
- 383 8. Shima N, Munroe RJ, Schimenti JC. The Mouse Genomic Instability Mutation *chaos1* Is  
384 an Allele of *Polq* That Exhibits Genetic Interaction with *Atm*. *Mol Cell Biol.* 2004;24:  
385 10381–10389. doi:10.1128/mcb.24.23.10381-10389.2004
- 386 9. Thyme SB, Schier AF. *Polq*-Mediated End Joining Is Essential for Surviving DNA Double-  
387 Strand Breaks during Early Zebrafish Development. *Cell Rep.* 2016;15: 707–714.  
388 doi:10.1016/j.celrep.2016.03.072
- 389 10. Boyd JB, Sakaguchi K, Harris P V. *mus308* Mutants of *Drosophila* exhibit hypersensitivity  
390 to DNA cross-linking agents and are defective in a deoxyribonuclease. *Genetics.*  
391 1990;125: 813–819.
- 392 11. Muzzini DM, Plevani P, Boulton SJ, Cassata G, Marini F. *Caenorhabditis elegans* POLQ-

- 393 1 and HEL-308 function in two distinct DNA interstrand cross-link repair pathways. *DNA*  
394 *Repair (Amst)*. 2008;7: 941–950. doi:10.1016/j.dnarep.2008.03.021
- 395 12. Wyatt DW, Feng W, Conlin MP, Yousefzadeh MJ, Roberts SA, Mieczkowski P, et al.  
396 Essential Roles for Polymerase  $\theta$ -Mediated End Joining in the Repair of Chromosome  
397 Breaks. *Mol Cell*. 2016;63: 662–673. doi:10.1016/j.molcel.2016.06.020
- 398 13. Feng W, Simpson DA, Carvajal-Garcia J, Price BA, Kumar RJ, Mose LE, et al. Genetic  
399 determinants of cellular addiction to DNA polymerase theta. *Nat Commun*. 2019;10.  
400 doi:10.1038/s41467-019-12234-1
- 401 14. Ceccaldi R, Liu JC, Amunugama R, Hajdu I, Primack B, Petalcorin MIR, et al.  
402 Homologous-recombination-deficient tumours are dependent on Pol $\theta$ -mediated repair.  
403 *Nature*. 2015;518: 258–262. doi:10.1038/nature14184
- 404 15. Mateos-Gomez PA, Gong F, Nair N, Miller KM, Lazzerini-Denchi E, Sfeir A. Mammalian  
405 polymerase  $\theta$  promotes alternative NHEJ and suppresses recombination. *Nature*.  
406 2015;518: 254–257. doi:10.1038/nature14157
- 407 16. Higgins GS, Boulton SJ. Beyond PARP—POL $\theta$  as an anticancer target. *Science (80-*  
408 *)*. 2018;359: 1217–1218. doi:10.1126/science.aar5149
- 409 17. Stark JM, Pierce AJ, Oh J, Pastink A, Jasin M. Genetic Steps of Mammalian Homologous  
410 Repair with Distinct Mutagenic Consequences. *Mol Cell Biol*. 2004;24: 9305–9316.  
411 doi:10.1128/mcb.24.21.9305-9316.2004
- 412 18. Zhu X, Dunn JM, Goddard AD, Squire JA, Becker A, Phillips RA, et al. Mechanisms of  
413 loss of heterozygosity in retinoblastoma. *Cytogenet Genome Res*. 1992;59: 248–252.  
414 doi:10.1159/000133261

- 415 19. Luo G, Santoro IM, McDaniel LD, Nishijima I, Mills M, Youssoufian H, et al. Cancer  
416 predisposition caused by elevated mitotic recombination in Bloom mice. *Nat Genet.*  
417 2000;26: 424–429. doi:10.1038/82548
- 418 20. Lemée F, Bergoglio V, Fernandez-Vidal A, Machado-Silva A, Pillaire M-J, Bieth A, et al.  
419 DNA polymerase theta up-regulation is associated with poor survival in breast cancer,  
420 perturbs DNA replication, and promotes genetic instability. *Proc Natl Acad Sci U S A.*  
421 2010;107: 13390–5. doi:10.1073/pnas.0910759107
- 422 21. Carvajal-Garcia J, Cho JE, Carvajal-Garcia P, Feng W, Wood RD, Sekelsky J, et al.  
423 Mechanistic basis for microhomology identification and genome scarring by polymerase  
424 theta. *Proc Natl Acad Sci U S A.* 2020;117: 8476–8485. doi:10.1073/pnas.1921791117
- 425 22. Fricke WM, Brill SJ. Slx1 - Slx4 is a second structure-specific endonuclease functionally  
426 redundant with Sgs1 - Top3. *Genes Dev.* 2003;17: 1768–1778. doi:10.1101/gad.1105203
- 427 23. Andersen SL, Bergstralh DT, Kohl KP, LaRocque JR, Moore CB, Sekelsky J. *Drosophila*  
428 MUS312 and the Vertebrate Ortholog BTBD12 Interact with DNA Structure-Specific  
429 Endonucleases in DNA Repair and Recombination. *Mol Cell.* 2009;35: 128–135.  
430 doi:10.1016/j.molcel.2009.06.019
- 431 24. Muñoz IM, Hain K, Déclais AC, Gardiner M, Toh GW, Sanchez-Pulido L, et al.  
432 Coordination of Structure-Specific Nucleases by Human SLX4/BTBD12 Is Required for  
433 DNA Repair. *Mol Cell.* 2009;35: 116–127. doi:10.1016/j.molcel.2009.06.020
- 434 25. Svendsen JM, Smogorzewska A, Sowa ME, O’Connell BC, Gygi SP, Elledge SJ, et al.  
435 Mammalian BTBD12/SLX4 Assembles A Holliday Junction Resolvase and Is Required for  
436 DNA Repair. *Cell.* 2009;138: 63–77. doi:10.1016/j.cell.2009.06.030

- 437 26. Fekairi S, Scaglione S, Chahwan C, Taylor ER, Tissier A, Coulon S, et al. Human SLX4  
438 Is a Holliday Junction Resolvase Subunit that Binds Multiple DNA Repair/Recombination  
439 Endonucleases. *Cell*. 2009;138: 78–89. doi:10.1016/j.cell.2009.06.029
- 440 27. Ip SCY, Rass U, Blanco MG, Flynn HR, Skehel JM, West SC. Identification of Holliday  
441 junction resolvases from humans and yeast. *Nature*. 2008;456: 357–361.  
442 doi:10.1038/nature07470
- 443 28. Wyatt HDM, Laister RC, Martin SR, Arrowsmith CH, West SC. The SMX DNA Repair Tri-  
444 nuclease. *Mol Cell*. 2017;65: 848-860.e11. doi:10.1016/j.molcel.2017.01.031
- 445 29. Chan YW, West S. GEN1 promotes Holliday junction resolution by a coordinated nick and  
446 counter-nick mechanism. *Nucleic Acids Res*. 2015;43: 10882–10892.  
447 doi:10.1093/nar/gkv1207
- 448 30. Bellendir SP, Rognstad DJ, Morris LP, Zapotoczny G, Walton WG, Redinbo MR, et al.  
449 Substrate preference of Gen endonucleases highlights the importance of branched  
450 structures as DNA damage repair intermediates. *Nucleic Acids Res*. 2017;45: 5333–  
451 5348. doi:10.1093/nar/gkx214
- 452 31. Brinkman EK, Chen T, Amendola M, Van Steensel B. Easy quantitative assessment of  
453 genome editing by sequence trace decomposition. *Nucleic Acids Res*. 2014;42.  
454 doi:10.1093/nar/gku936
- 455 32. Song Z, McCall K, Steller H. DCP-1, a *Drosophila* cell death protease essential for  
456 development. *Science (80- )*. 1997;275: 536–540. doi:10.1126/science.275.5299.536
- 457 33. Adams MD, McVey M, Sekelsky JJ. *Drosophila* BLM in double-strand break repair by  
458 synthesis-dependent strand annealing. *Science (80- )*. 2003;299: 265–267.

459 doi:10.1126/science.1077198

460 34. McVey M, Andersen SL, Broze Y, Sekelsky J. Multiple functions of drosophila BLM  
461 helicase in maintenance of genome stability. *Genetics*. 2007;176: 1979–1992.

462 doi:10.1534/genetics.106.070052

463 35. Kenny Kuo H, McMahan S, Rota CM, Kohl KP, Sekelsky J. Drosophila FANCM helicase  
464 prevents spontaneous mitotic crossovers generated by the MUS81 and SLX1 nucleases.  
465 *Genetics*. 2014;198: 935–945. doi:10.1534/genetics.114.168096

466 36. Schrempf A, Slysokova J, Loizou JI. Targeting the DNA Repair Enzyme Polymerase  $\theta$  in  
467 Cancer Therapy. *Trends in Cancer*. 2020;xx: 1–14. doi:10.1016/j.trecan.2020.09.007

468 37. Davis L, Khoo KJ, Zhang Y, Maizels N. POLQ suppresses interhomolog recombination  
469 and loss of heterozygosity at targeted DNA breaks. *Proc Natl Acad Sci U S A*. 2020;117:  
470 22900–22909. doi:10.1073/pnas.2008073117

471 38. Klovstad M, Abdu U, Schüpbach T. Drosophila *brca2* is required for mitotic and meiotic  
472 DNA repair and efficient activation of the meiotic recombination checkpoint. *PLoS Genet*.  
473 2008;4. doi:10.1371/journal.pgen.0040031

474 39. Thomas AM, Hui C, South A, McVey M. Common variants of drosophila melanogaster  
475 *Cyp6d2* cause camptothecin sensitivity and synergize with loss of *Brca2*. *G3 Genes,*  
476 *Genomes, Genet*. 2013;3: 91–99. doi:10.1534/g3.112.003996

477 40. Beagan K, Armstrong RL, Witsell A, Roy U, Renedo N, Baker AE, et al. Drosophila DNA  
478 polymerase theta utilizes both helicase-like and polymerase domains during  
479 microhomology-mediated end joining and interstrand crosslink repair. *PLoS Genet*.  
480 2017;13. doi:10.1371/journal.pgen.1006813

- 481 41. Yildiz Ö, Majumder S, Kramer B, Sekelsky JJ. *Drosophila* MUS312 interacts with the  
482 nucleotide excision repair endonuclease MEI-9 to generate meiotic crossovers. *Mol Cell*.  
483 2002;10: 1503–1509. doi:10.1016/S1097-2765(02)00782-7
- 484 42. Andersen SL, Kuo HK, Savukoski D, Brodsky MH, Sekelsky J. Three structure-selective  
485 endonucleases are essential in the absence of BLM helicase in *Drosophila*. *PLoS Genet*.  
486 2011;7. doi:10.1371/journal.pgen.1002315
- 487 43. Trowbridge K, McKim K, Brill SJ, Sekelsky J. Synthetic lethality of *drosophila* in the  
488 absence of the MUS81 endonuclease and the DmBlm helicase is associated with  
489 elevated apoptosis. *Genetics*. 2007;176: 1993–2001. doi:10.1534/genetics.106.070060
- 490 44. Port F, Chen H-M, Lee T, Bullock SL. Optimized CRISPR/Cas tools for efficient germline  
491 and somatic genome engineering in *Drosophila*. *Proc Natl Acad Sci*. 2014;111: E2967–  
492 E2976. doi:10.1073/pnas.1405500111
- 493 45. Gratz SJ, Cummings AM, Nguyen JN, Hamm DC, Donohue LK, Harrison MM, et al.  
494 Genome engineering of *Drosophila* with the CRISPR RNA-guided Cas9 nuclease.  
495 *Genetics*. 2013. pp. 1029–1035. doi:10.1534/genetics.113.152710
- 496 46. Sekelsky J. DNA repair in *Drosophila*: Mutagens, models, and missing genes. *Genetics*.  
497 2017;205: 471–490. doi:10.1534/genetics.116.186759
- 498 47. Janetzko K, Rink G, Hecker A, Bieback K, Klüter H, Bugert P. A single-tube real-time  
499 PCR assay for mycoplasma detection as a routine quality control of cell therapeutics.  
500 *Transfus Med Hemotherapy*. 2014;41: 83–89. doi:10.1159/000357096
- 501 48. Battaglia M, Pozzi D, Crimaldi S, Parasassi T. Hoechst 33258 staining for detecting  
502 mycoplasma contamination in cell cultures: A method for reducing fluorescence

- 503 photobleaching. *Biotech Histochem.* 1994;69: 152–156.  
504 doi:10.3109/10520299409106277
- 505 49. Lin S, Staahl BT, Alla RK, Doudna JA. Enhanced homology-directed human genome  
506 engineering by controlled timing of CRISPR/Cas9 delivery. *Elife.* 2014;3: e04766.  
507 doi:10.7554/eLife.04766
- 508 50. Franken NAP, Rodermond HM, Stap J, Haveman J, van Bree C. Clonogenic assay of  
509 cells in vitro. *Nat Protoc.* 2006;1: 2315–2319. doi:10.1038/nprot.2006.339
- 510 51. Dewey EB, Johnston CA. Diverse mitotic functions of the cytoskeletal cross-linking  
511 protein Shortstop suggest a role in Dynein/Dynactin activity. *Mol Biol Cell.* 2017;28:  
512 2555–2565. doi:10.1091/mbc.E17-04-0219

513

## 514 **Figure legends**

515 **Figure 1. The genetic interaction between *POLQ* and *BRCA2* is conserved in *Drosophila***  
516 ***melanogaster*.** A) Schematic of the DSB pathways following end resection, including a partial list  
517 of proteins involved in each step. Synthetic lethal with Pol  $\theta$  shown in red. B) Genotypes of the  
518 flies crossed to assess the viability of *PolQ*, *Brca2*, and *PolQ Brca2* mutants (left). Fraction of  
519 homozygous mutant flies observed and, in parentheses, expected by Mendelian genetics. C)  
520 Observed survival of homozygous mutant files for the indicated genes expressed as percent of  
521 expected. Horizontal dashed line at Y=100 indicates 100% survival. N=696 (*POLQ*), 331  
522 (*BRCA2*), 612 (*POLQ BRCA2*).

523 **Figure 2. *POLQ* is required for viability in the absence *SLX4* and *GEN1*.** A) Observed survival  
524 of homozygous mutant files for the indicated genes expressed as percent of expected. N=1126  
525 (*POLQ SLX4*), 747 (*POLQ GEN1*), 257 (*SLX4 GEN1*), 448 (*POLQ SLX4 GEN1*). B), C) and D)

526 Survival of flies exposed to 1000 rads of ionizing radiation (B and D) or 10  $\mu$ M camptothecin (C)  
527 homozygous mutant for the indicated genes with respect to the untreated progeny of the same  
528 parents. Horizontal dashed line at Y=100 indicates 100% survival. Error bars represent 95%  
529 confidence intervals (CI).

530 **Figure 3. Genetic interaction between POLQ and SLX4 in mouse cell culture.** A) *wt*, *Polq*<sup>-/-</sup>  
531 and complemented *Polq*<sup>-/-</sup> MEFs were electroporated with Cas9 targeted with a gRNA to the  
532 *Rosa26* (R26) locus or to *Slx4*. 72 hours later, 500 cells were plated into each of three plates to  
533 assay viability. Genomic DNA from the remaining cells was used as a template for amplification  
534 around the breaks. PCR product was sequenced and editing efficiency was calculated with TIDE.  
535 B) Survival after Cas9 cleavage targeted by the *SLX4* gRNA, relative to the *R26* gRNA for each  
536 cell line. Editing efficiency is indicated above the graph. Error bars represent standard error of the  
537 mean, n=3 biological replicates.

538 **Figure 4. POLQ SLX4 GEN1 flies have high levels of apoptosis.** A) Images of representative  
539 *POLQ* mutant and *POLQ SLX4* mutant female flies, arrow points to defects in abdominal banding  
540 pattern. B) Images of representative wing imaginal discs from third instar larvae of the indicated  
541 genotypes stained with an anti-Dcp1 antibody (green) and DAPI (blue). C) Quantification the Dcp-  
542 1 signal expressed as the percent of the area of Dcp-1 within each disc. Error bars represent 95%  
543 CI.

544 **Figure 5. Pol  $\theta$  suppresses mitotic crossing over.** A) Third chromosomes (maternal, ♀, and  
545 paternal, ♂) of a male fly expressing Cas9 and a gRNA targeting the *ry* gene, and heterozygous  
546 for the markers *st* and *e*. The PAM sequence for the gRNA in the maternal chromosome, and lack  
547 thereof in the paternal one, is indicated. Wt *ry* (+) in the maternal chromosome indicates either  
548 unedited (if PAM is present) or HR repair (if PAM is absent). Mutant *ry* (-) indicates repair by  
549 mutagenic end joining. B) Percent of chromosomes repaired by HR, EJ, or unedited, calculated  
550 by assessing the *ry* and PAM status. n=56. C) Third chromosomes of a male fly described in



551 panel A before and after the generation of a mitotic crossover. D) Percent flies with a crossover  
552 in the progeny of single males like the one described in panel A. Males were maternal and zygotic  
553 mutants for the indicated genes. N=97 (wt), 55 (*POLQ*), 62 (*SLX4*), 60 (*GEN1*), 69 (*SLX4 GEN1*).  
554 Error bars represent 95% CI.

A

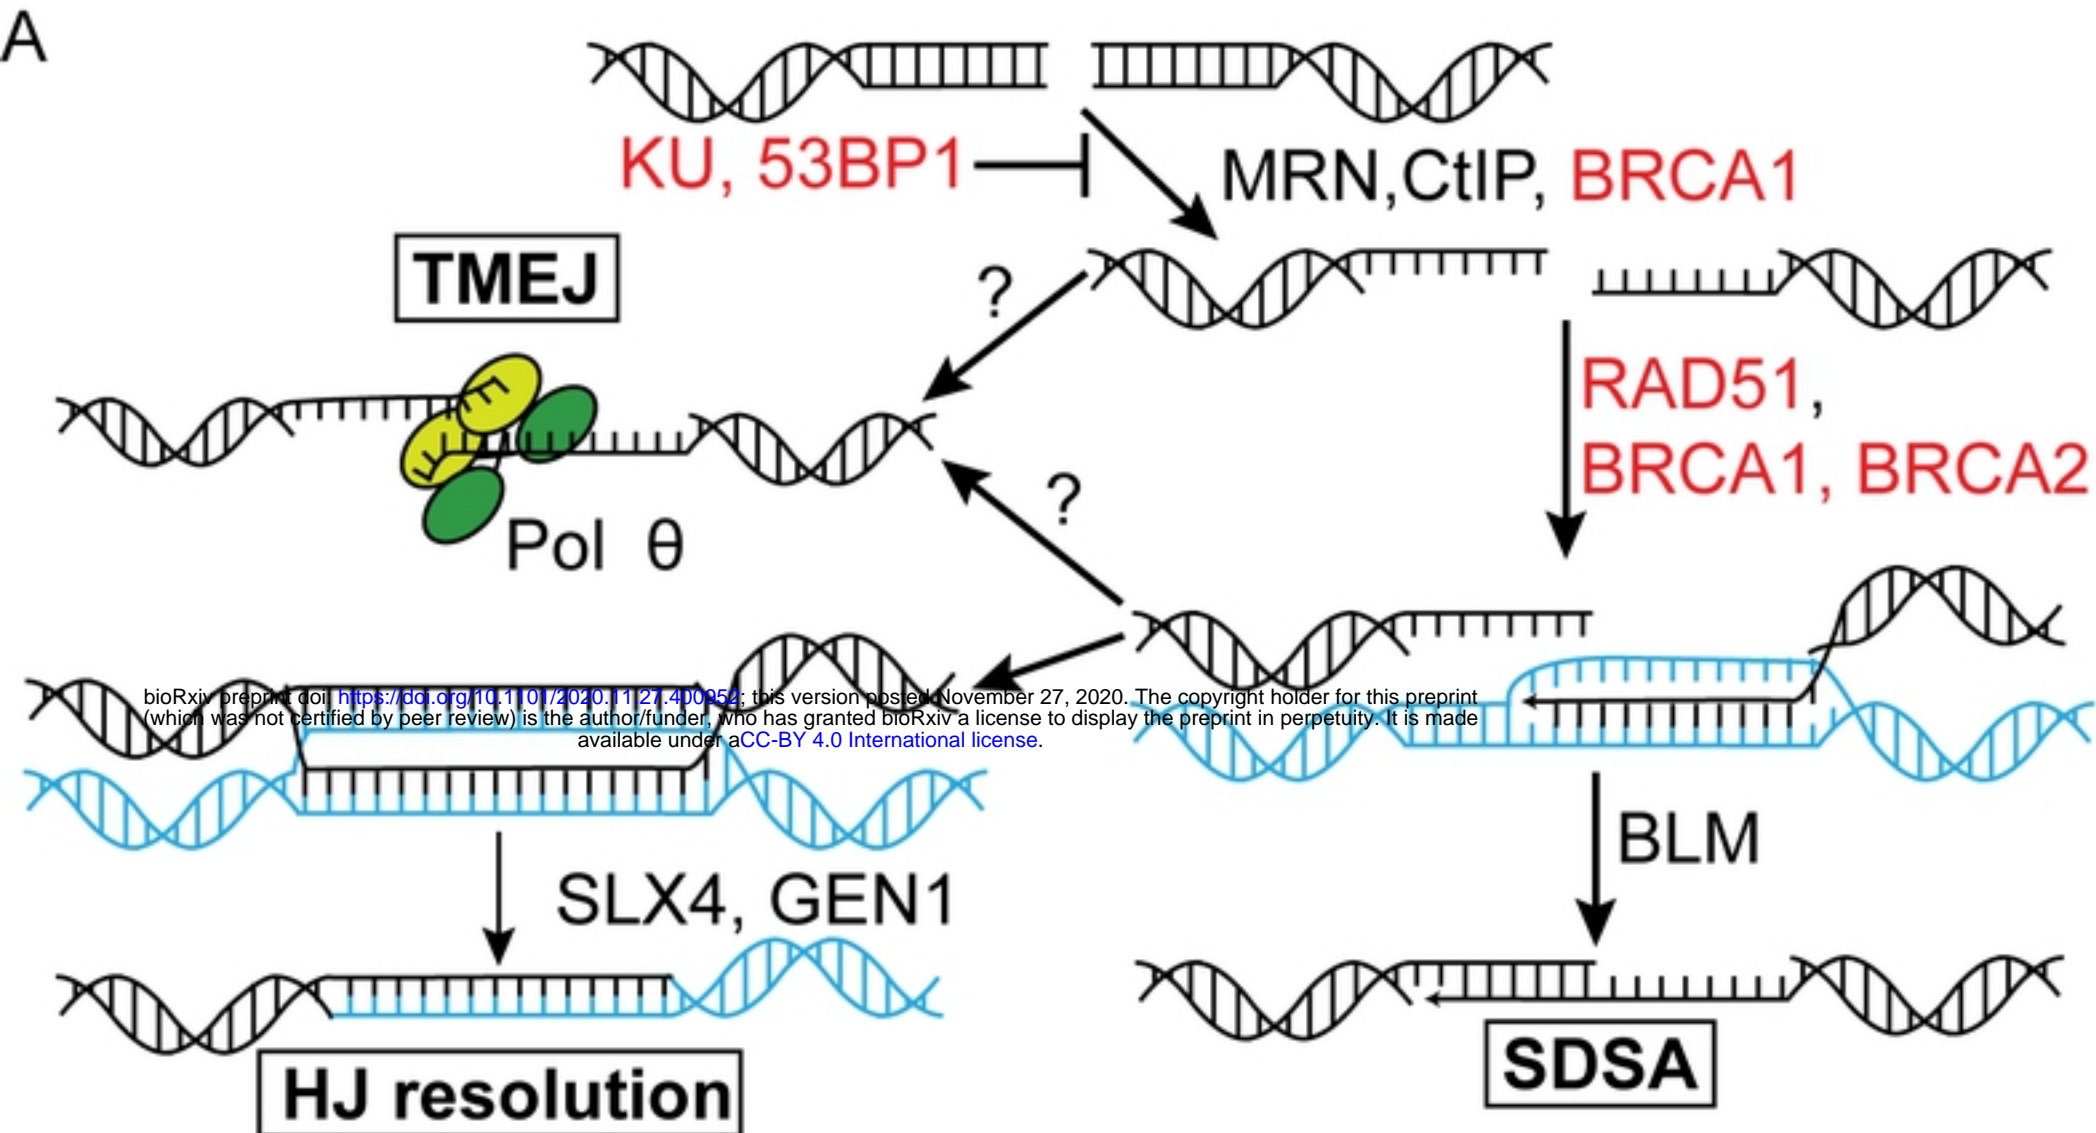

B

|                                                                                                       | Observed<br>(expected) |
|-------------------------------------------------------------------------------------------------------|------------------------|
| $\frac{PolQ^{null}}{Hu} \otimes \frac{PolQ^{null}}{Hu}$                                               | 0.36<br>(0.33)         |
| $\frac{brca2^{KO}}{Cy} \otimes \frac{brca2^{47}}{Cy}$                                                 | 0.32<br>(0.33)         |
| $\frac{brca2^{KO}}{Cy}; \frac{PolQ^{null}}{Hu} \otimes \frac{brca2^{47}}{Cy}; \frac{PolQ^{null}}{Hu}$ | 0.013<br>(0.11)        |

C

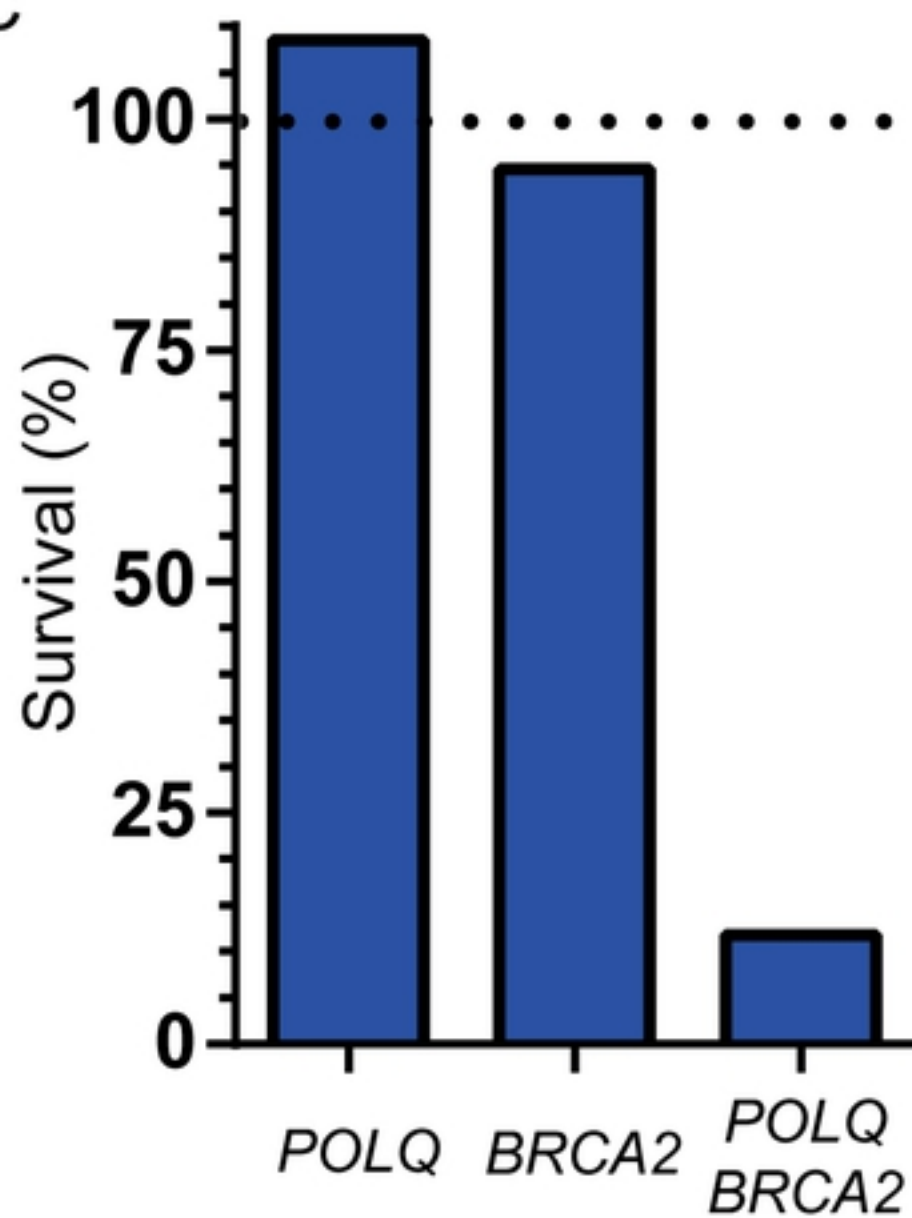

Figure 1

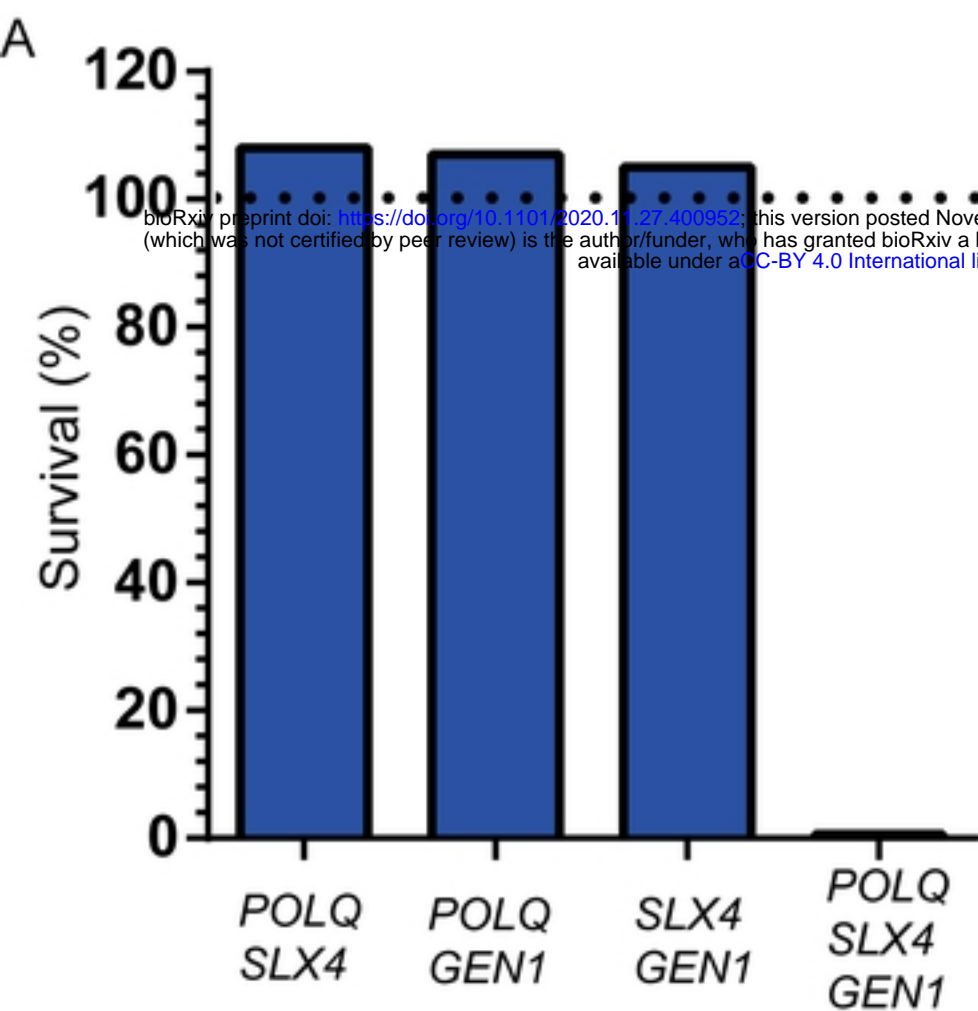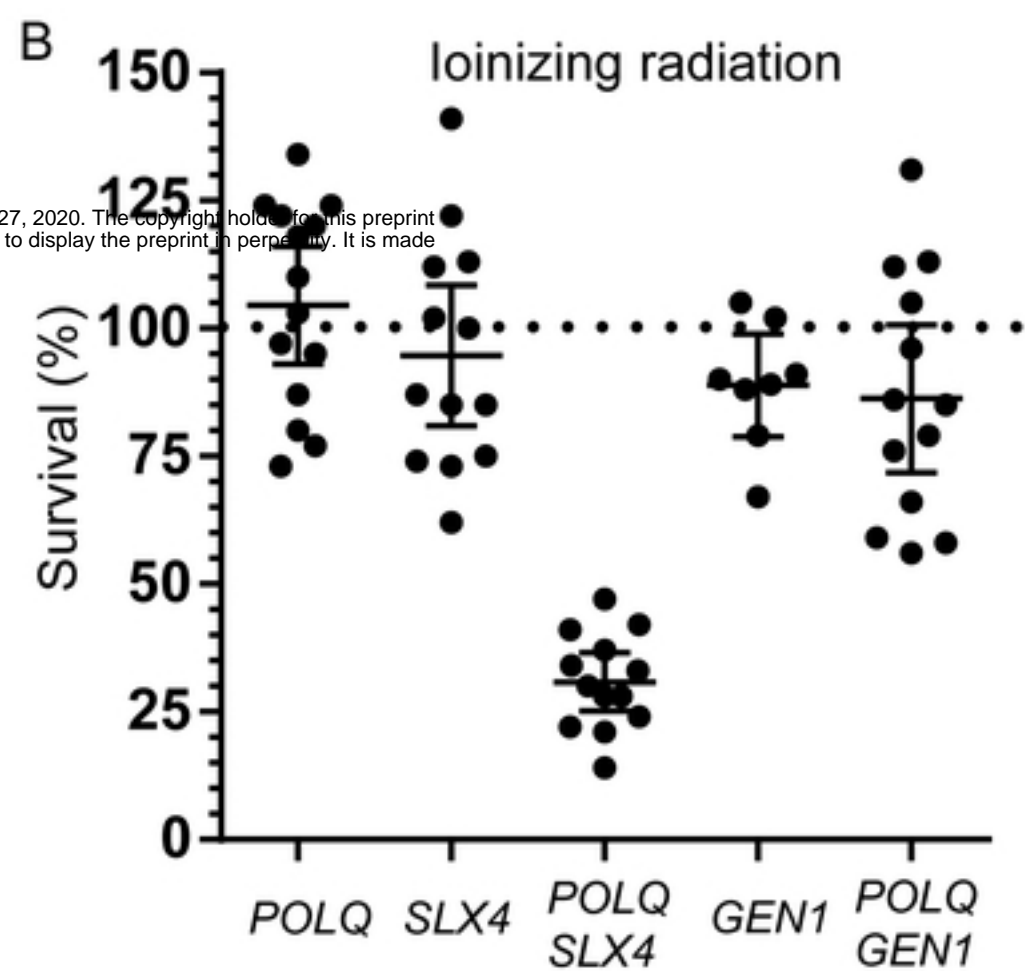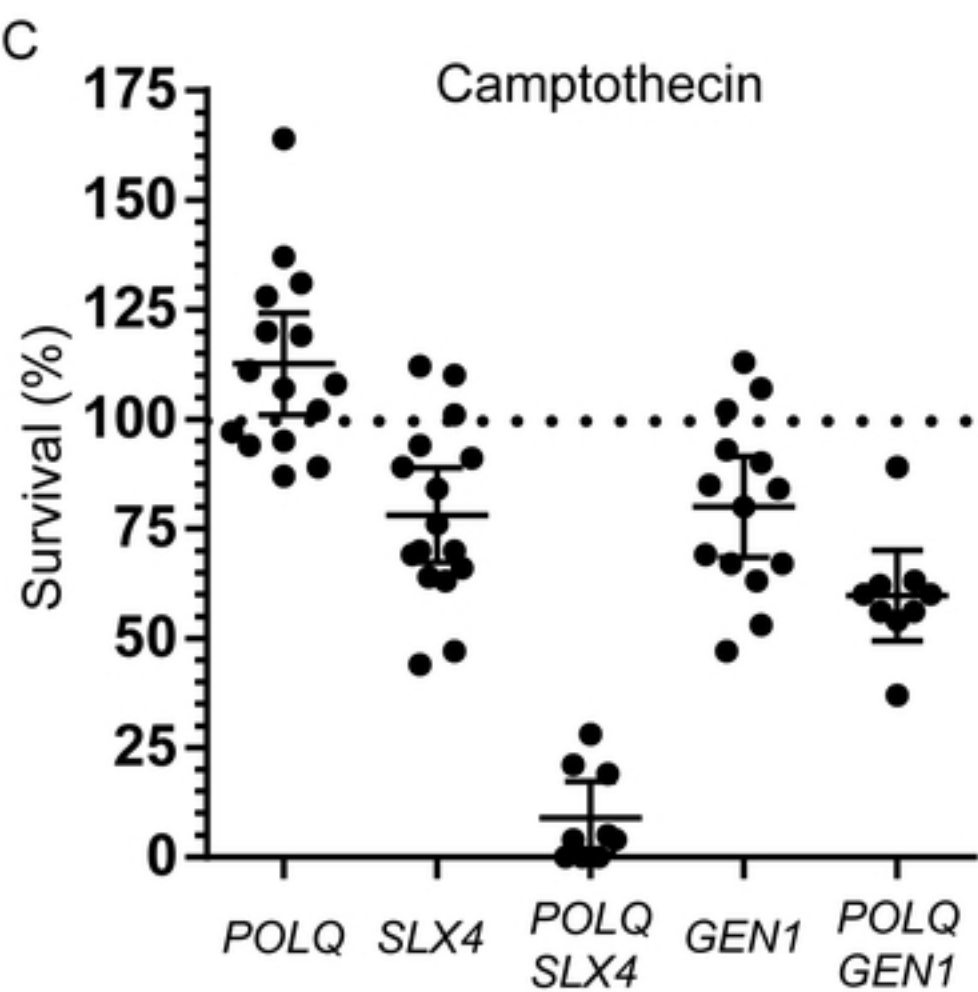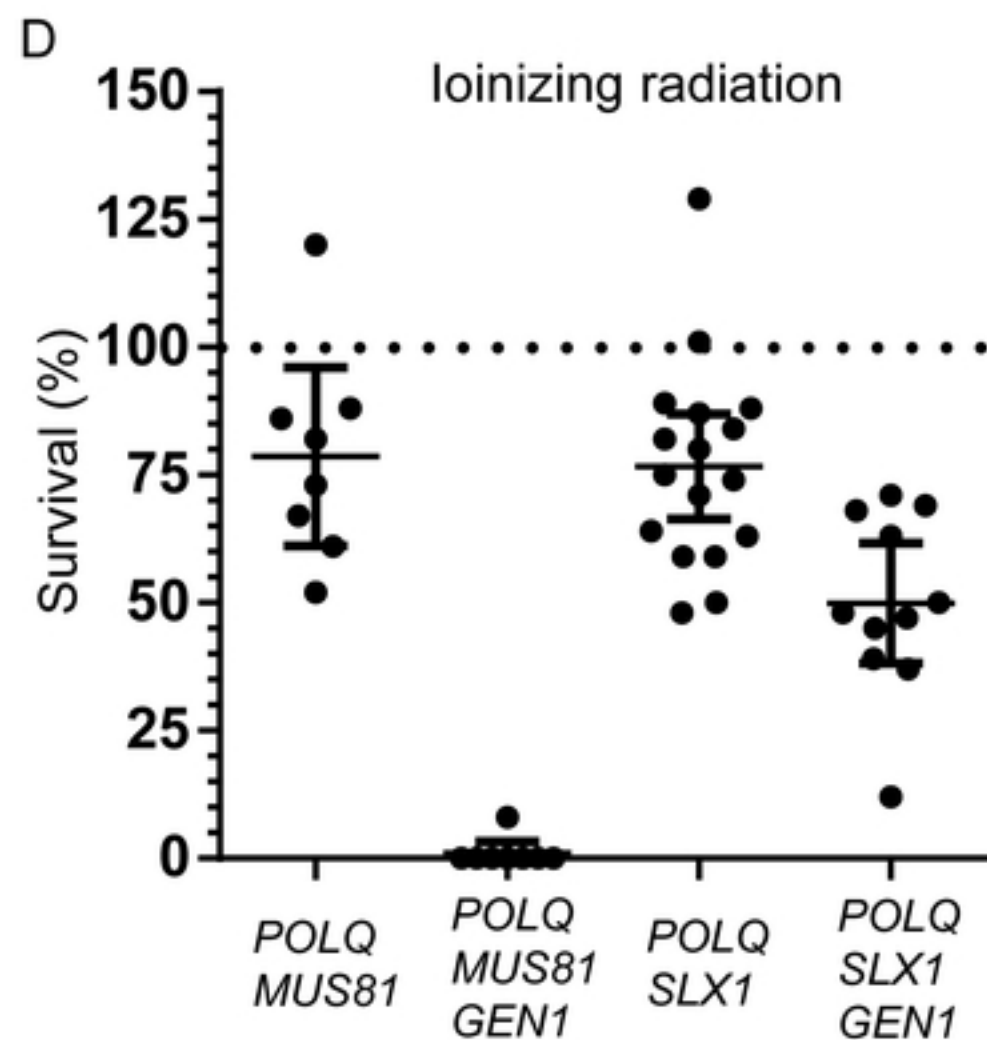

Figure 2

bioRxiv preprint doi: <https://doi.org/10.1101/2020.11.27.400952>; this version posted November 27, 2020. The copyright holder for this preprint (which was not certified by peer review) is the author/funder, who has granted bioRxiv a license to display the preprint in perpetuity. It is made available under aCC-BY 4.0 International license.

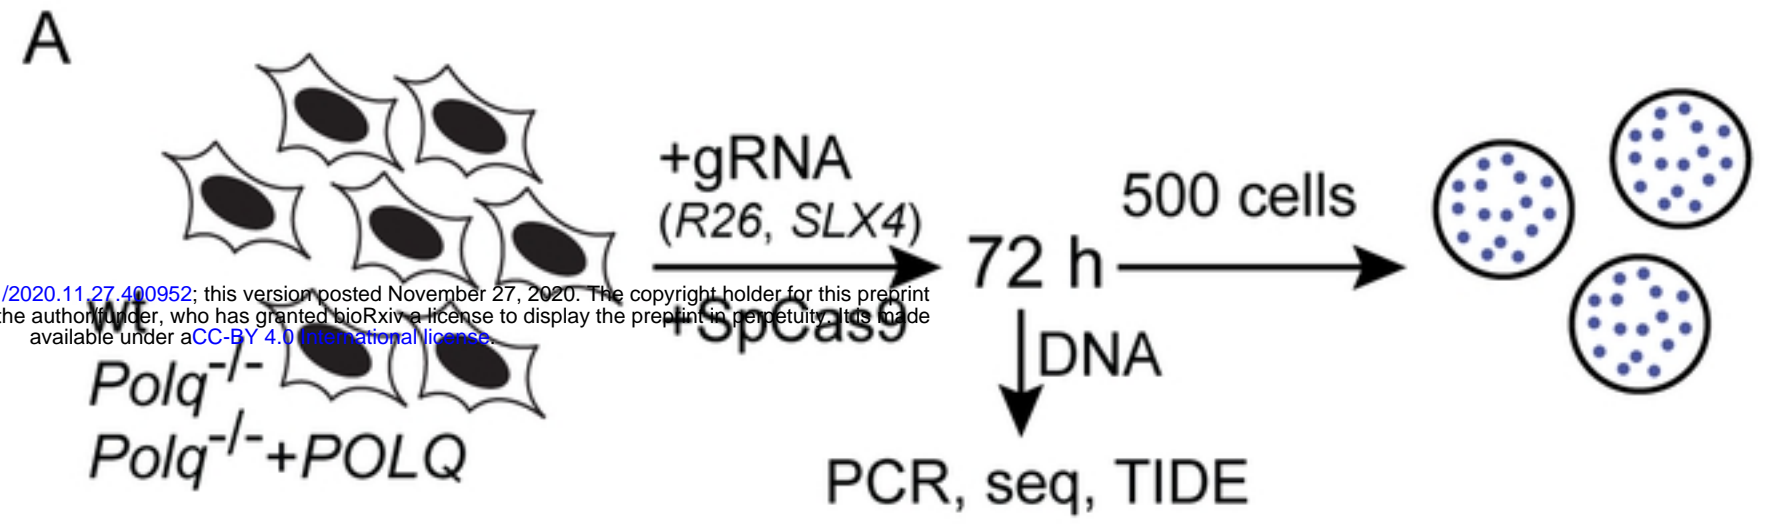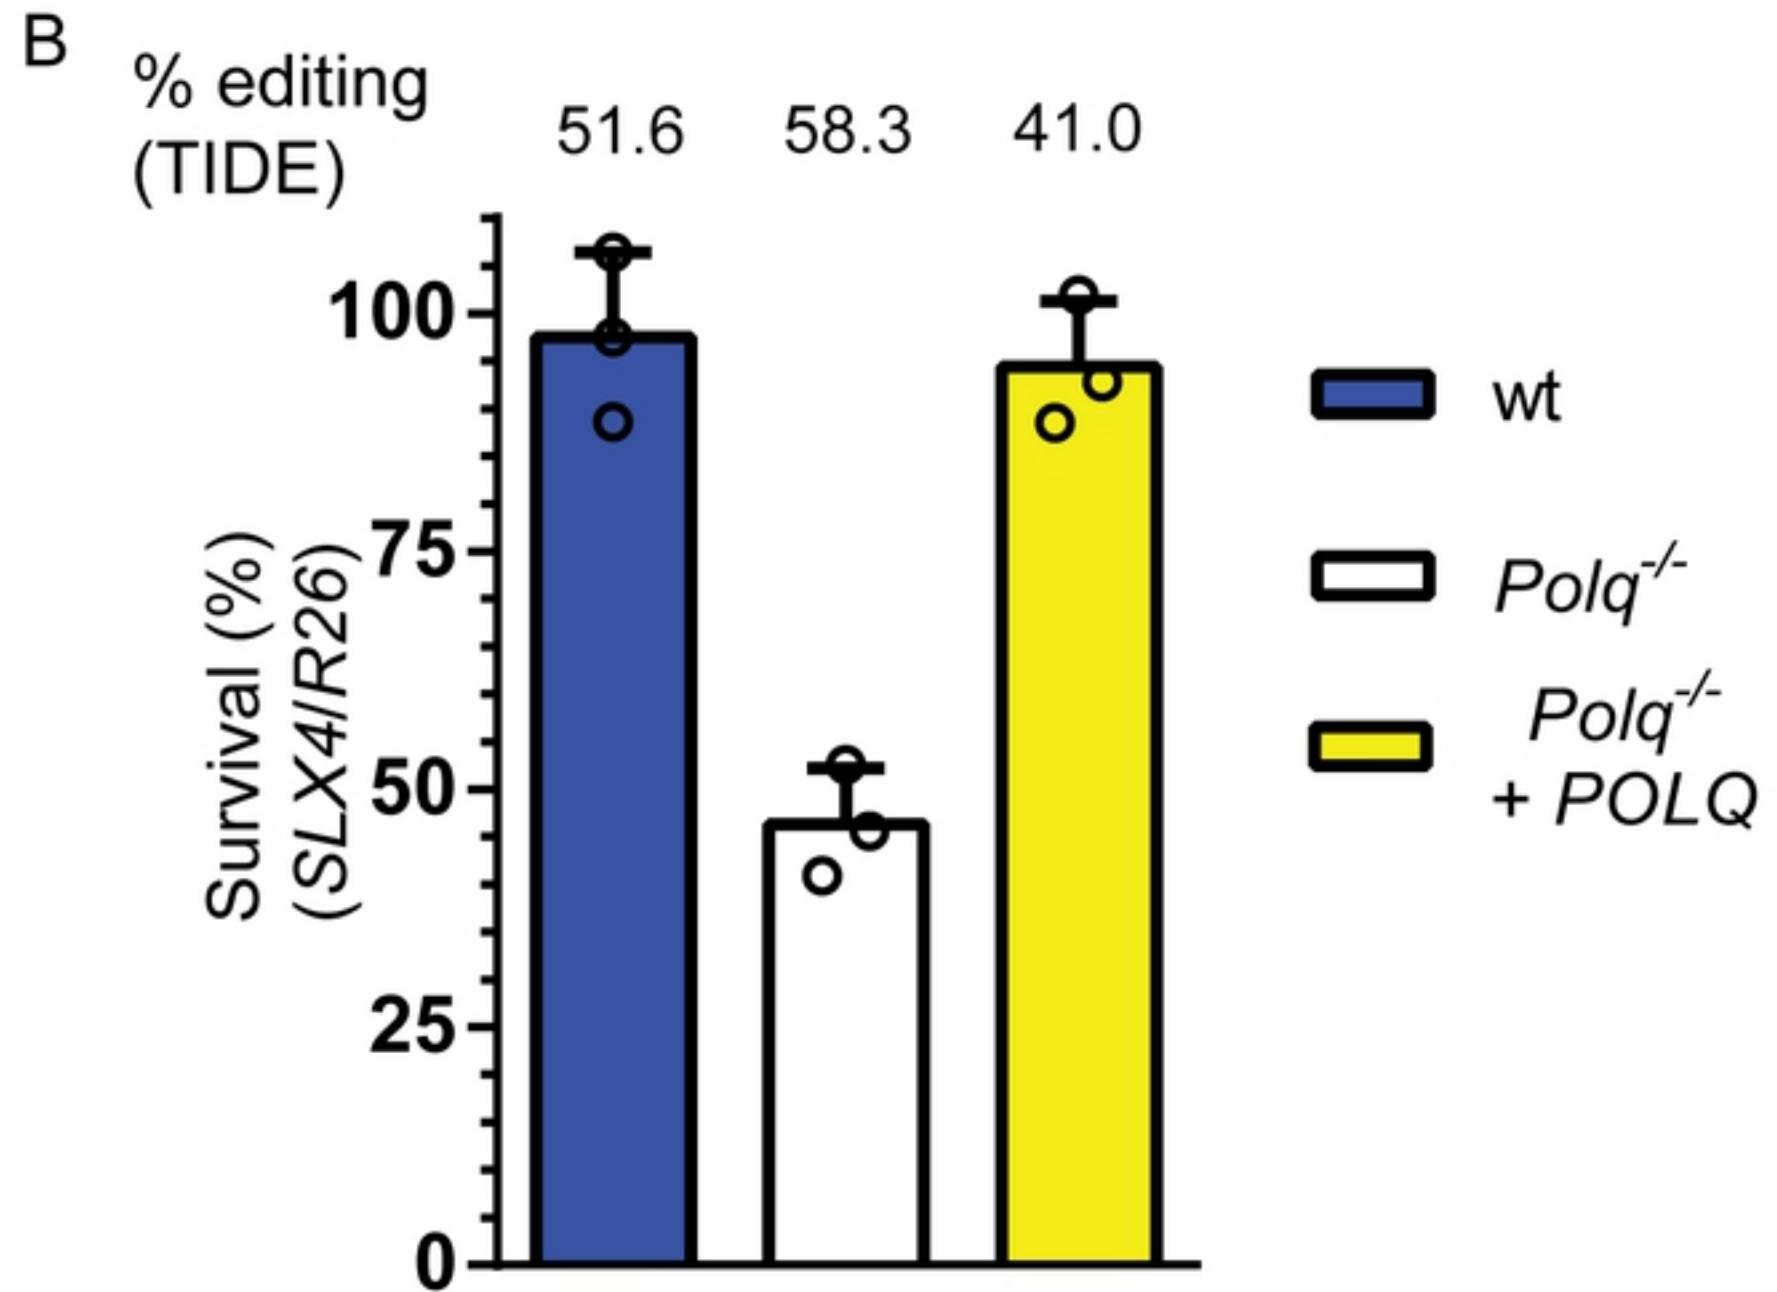

Figure 3

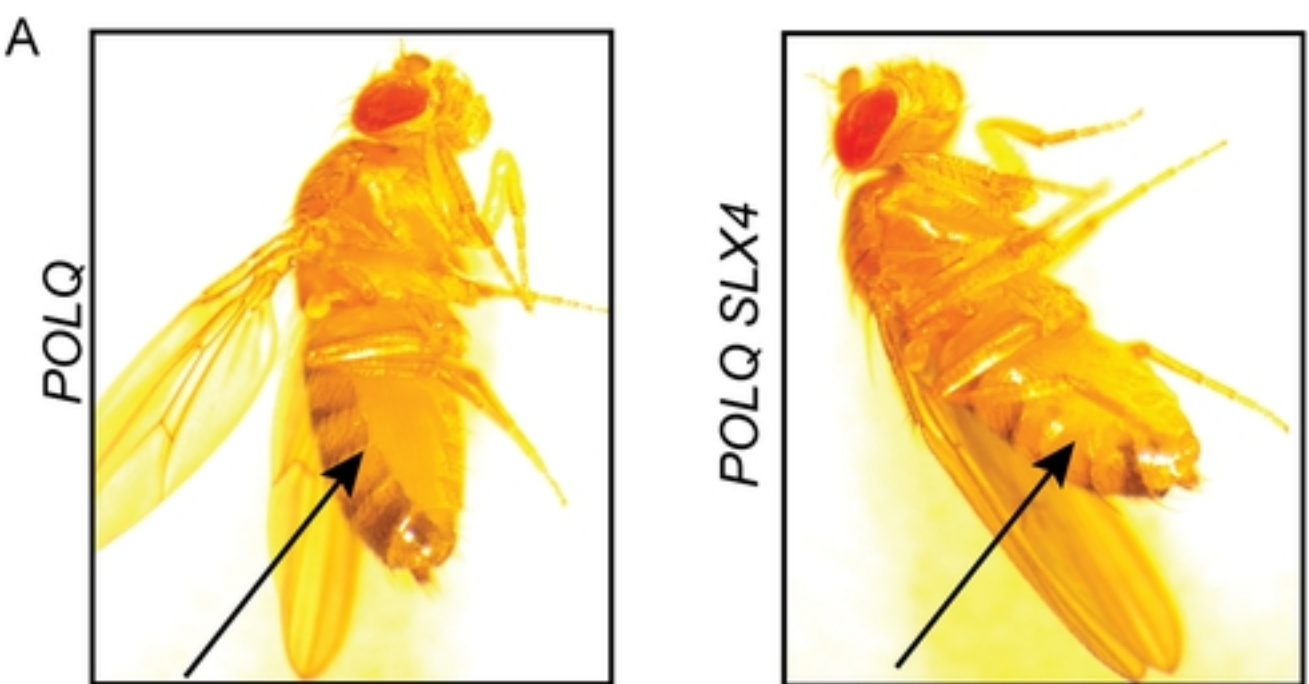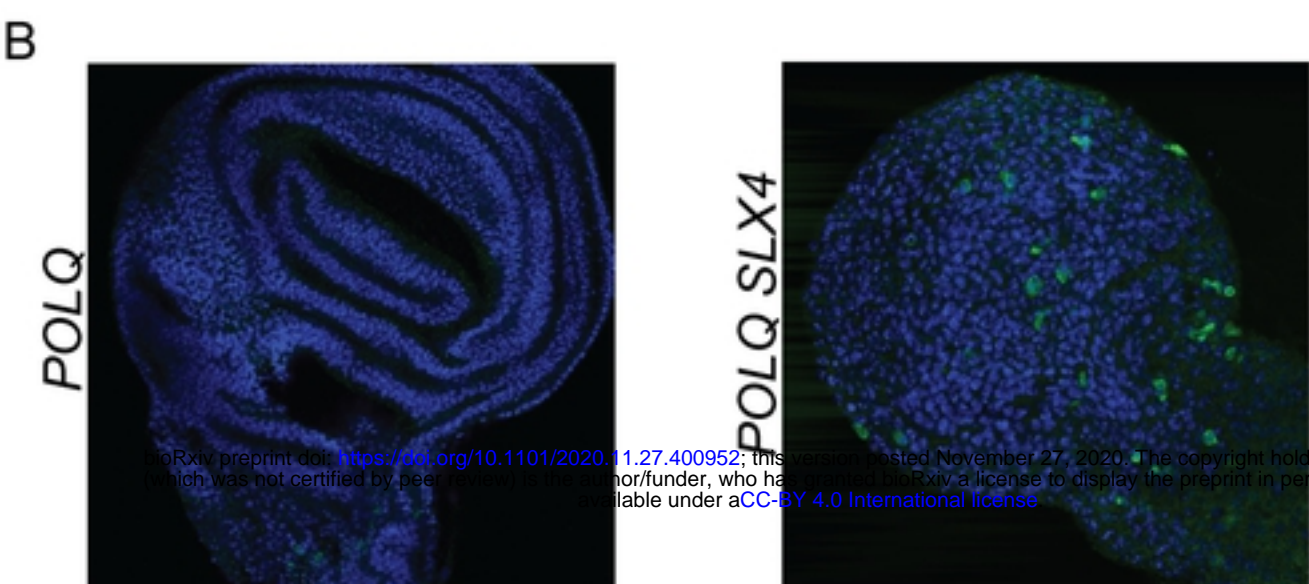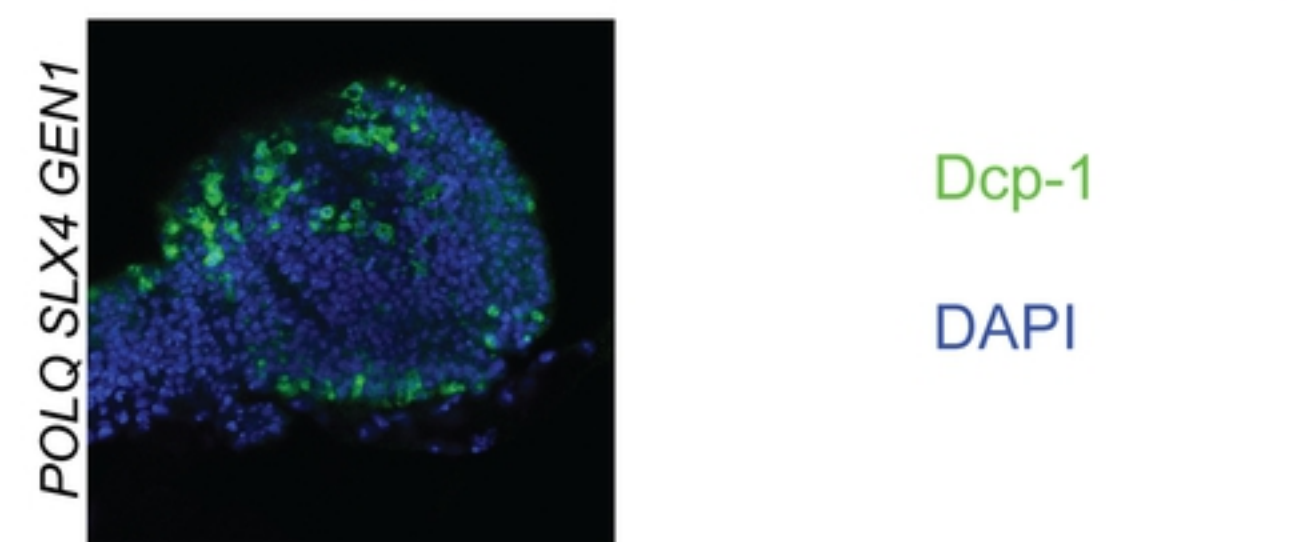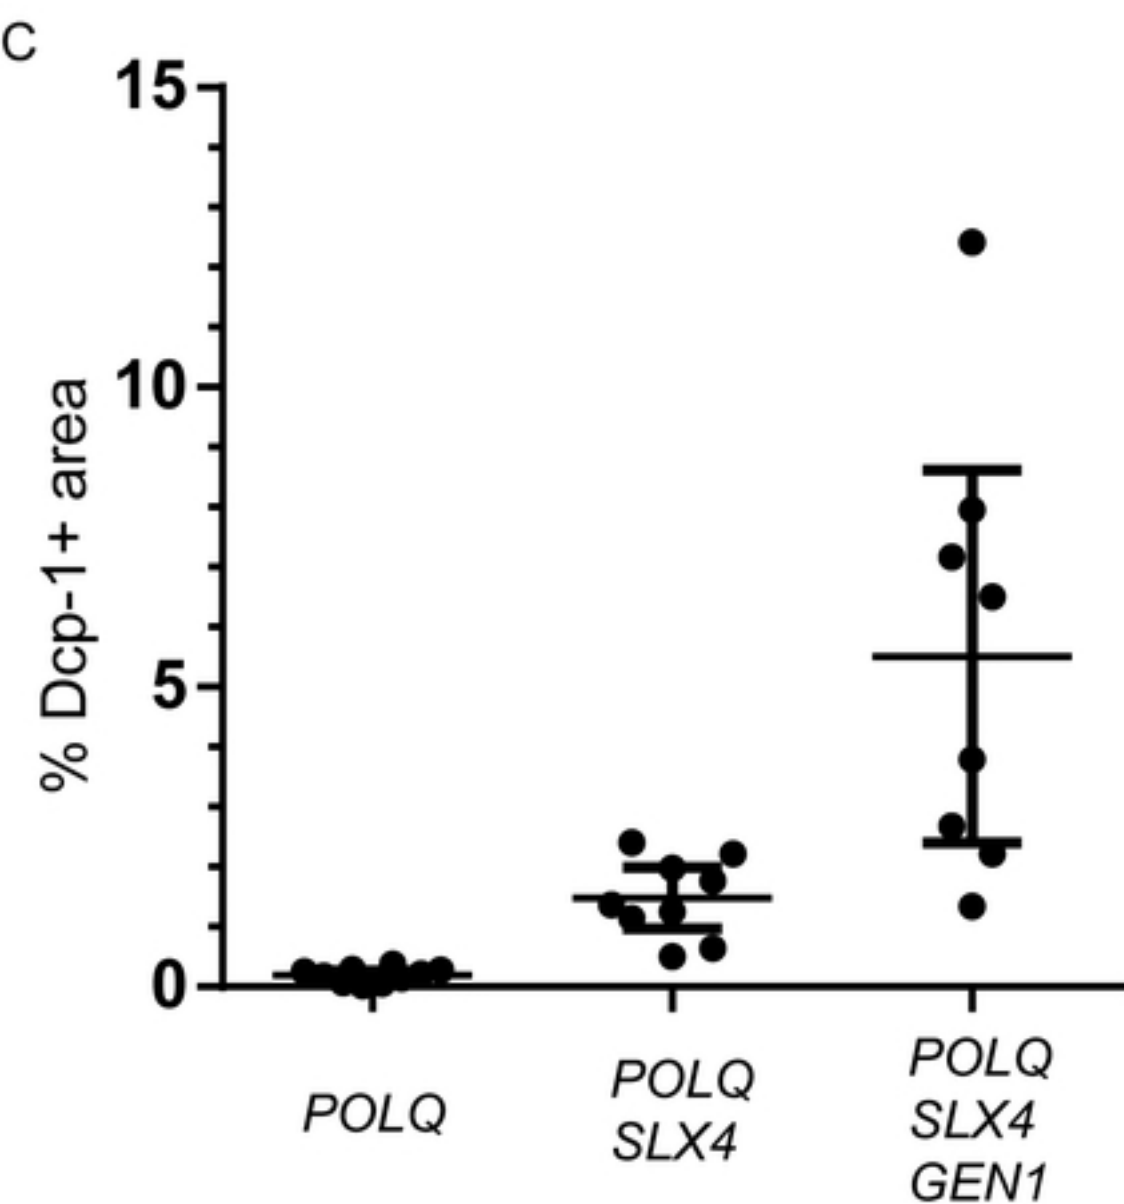

Figure 4

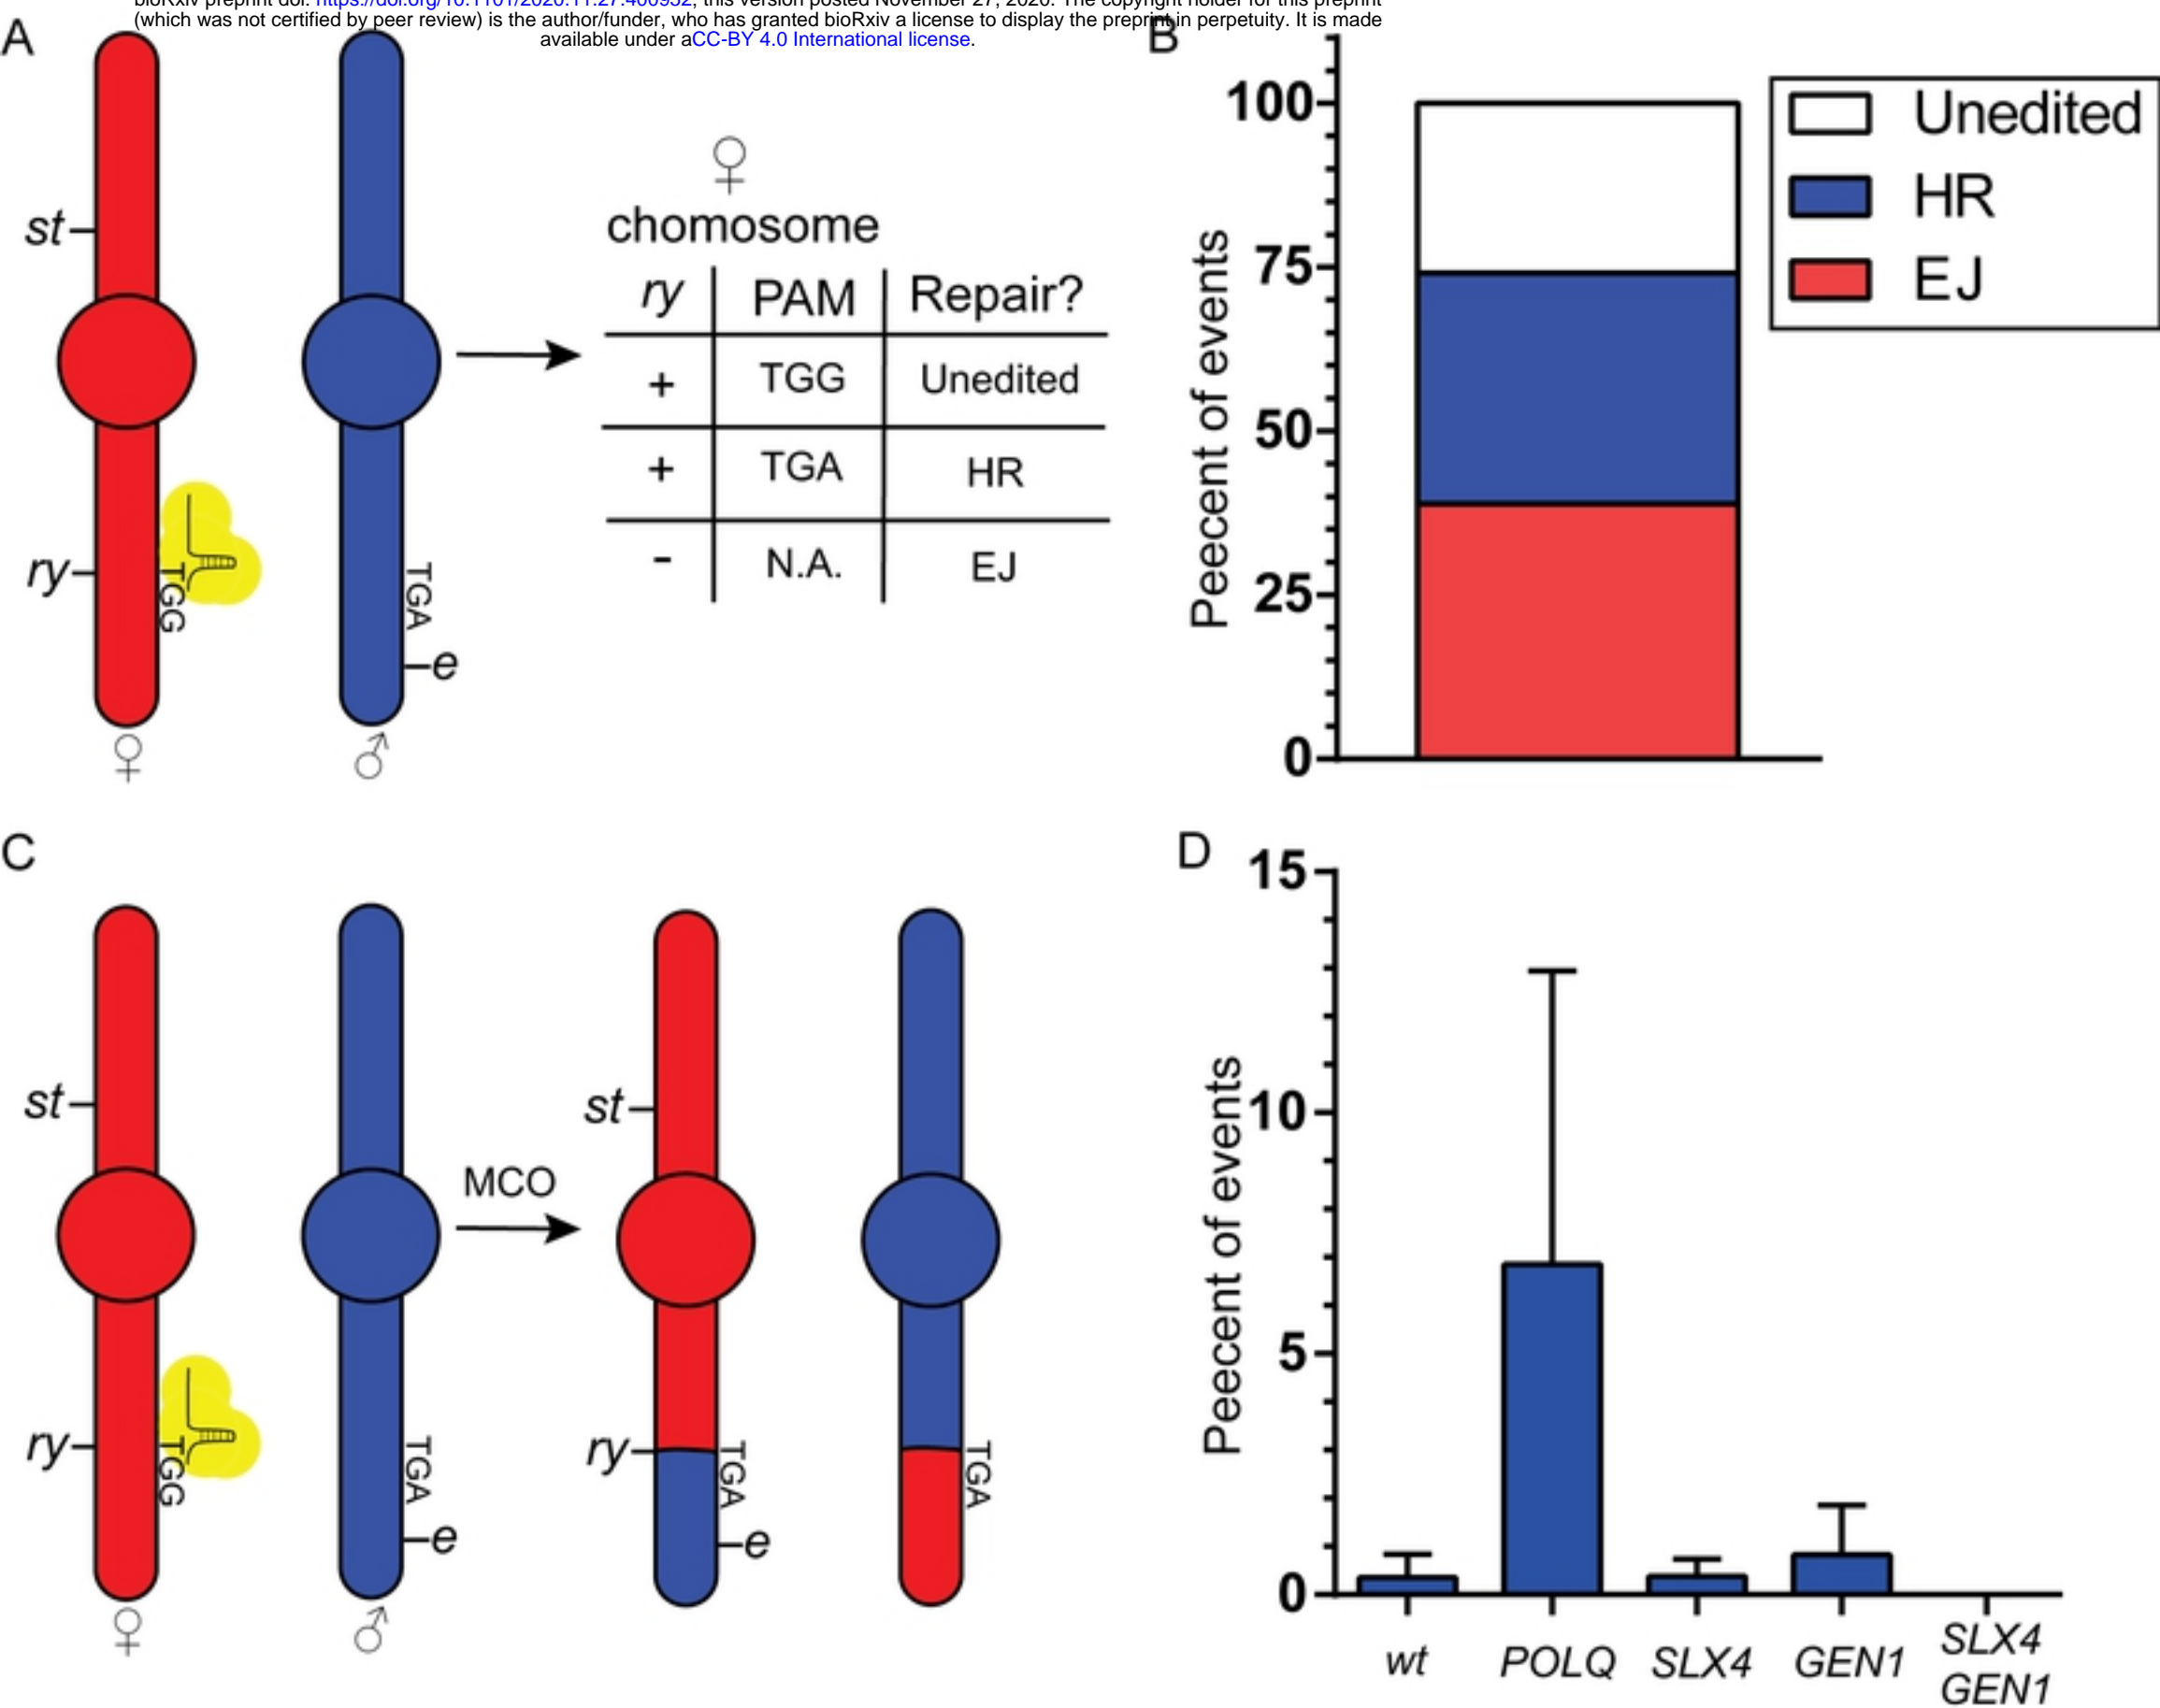

Figure 5
